# Supplementary material for: Hydrogeochemical Characteristics of Hot Springs and Their Short-Term Seismic Precursor Anomalies along the Xiaojiang Fault Zone, Southeast Tibet Plateau
Source: MDPI journal article supplement (doi:10.3390/w13192638), 2021-09-25

Table S5 Results of the three continuous monitoring sites.

| Xundian spring (S7) |      |                 |                            |                        |                        |                        |                        |                                      |                        |           |
|---------------------|------|-----------------|----------------------------|------------------------|------------------------|------------------------|------------------------|--------------------------------------|------------------------|-----------|
| Date(yyyy/mm/dd)    | pH   | EC( $\mu$ S/cm) | Temperature( $^{\circ}$ C) | Na <sup>+</sup> (mg/L) | CP detection Joinpoint | Cl <sup>-</sup> (mg/L) | CP detection Joinpoint | SO <sub>4</sub> <sup>2-</sup> (mg/L) | CP detection Joinpoint | TDS(mg/L) |
| 4/10/2019           |      |                 |                            | 126.20                 |                        | 17.82                  |                        | 485.06                               |                        | 1133.73   |
| 4/23/2019           | 7.65 | 1299            | 58.6                       | 125.09                 |                        | 17.07                  |                        | 478.38                               |                        | 925.31    |
| 5/1/2019            | 6.97 | 1789            | 58.4                       | 126.35                 |                        | 17.12                  |                        | 492.72                               |                        | 1261.52   |
| 5/4/2019            | 7.55 | 1447            | 58.4                       | 127.48                 |                        | 17.47                  |                        | 494.30                               |                        | 1047.47   |
| 5/7/2019            | 6.91 | 1785            | 58.4                       | 125.63                 |                        | 17.56                  |                        | 487.58                               |                        | 1247.49   |
| 5/10/2019           | 6.94 | 1800            | 58.5                       | 125.13                 |                        | 18.00                  |                        | 491.93                               |                        | 1263.71   |
| 5/13/2019           | 7.48 | 1517            | 58.5                       | 125.97                 |                        | 17.17                  |                        | 485.39                               |                        | 1113.77   |
| 5/16/2019           | 6.87 | 1810            | 58.6                       | 126.11                 |                        | 19.32                  |                        | 484.06                               |                        | 1226.85   |
| 5/19/2019           | 7.44 | 1564            | 58.6                       | 127.35                 |                        | 18.32                  |                        | 498.96                               |                        | 1252.18   |
| 5/22/2019           | 7.06 | 1781            | 58.6                       | 125.13                 |                        | 17.60                  |                        | 489.24                               |                        | 1233.49   |
| 5/25/2019           | 6.79 | 1797            | 58.5                       | 126.35                 |                        | 17.48                  |                        | 491.36                               |                        | 1211.73   |
| 5/28/2019           | 6.88 | 1785            | 58.5                       | 125.09                 |                        | 17.28                  |                        | 490.50                               |                        | 1215.82   |
| 5/31/2019           | 6.89 | 1784            | 58.5                       | 123.91                 |                        | 18.16                  |                        | 495.60                               |                        | 1254.16   |
| 6/3/2019            | 6.88 | 2020            | 58.5                       | 125.79                 |                        | 16.85                  |                        | 473.84                               |                        |           |
| 6/6/2019            | 6.93 | 2014            | 58.5                       | 116.50                 |                        | 15.93                  |                        | 445.05                               |                        |           |
| 6/9/2019            | 7.34 | 2003            | 58.5                       | 123.64                 |                        | 16.93                  |                        | 477.31                               |                        |           |
| 6/12/2019           | 7.09 | 1982            | 58.7                       | 120.39                 |                        | 16.54                  |                        | 462.88                               |                        |           |
| 6/15/2019           | 6.88 | 1984            | 58.6                       | 115.84                 |                        | 15.82                  |                        | 444.05                               |                        |           |
| 6/18/2019           | 6.89 | 1991            | 58.6                       | 122.19                 |                        | 16.65                  |                        | 471.24                               |                        |           |
| 6/21/2019           | 6.85 | 1977            | 58.6                       | 120.44                 |                        | 16.46                  |                        | 464.17                               |                        |           |
| 6/24/2019           | 6.88 | 1954            | 58.6                       | 121.22                 |                        | 16.61                  |                        | 468.18                               |                        |           |
| 6/27/2019           | 7.03 | 1957            | 58.6                       | 121.46                 |                        | 16.53                  |                        | 467.83                               |                        |           |
| 6/30/2019           | 6.8  | 1959            | 58.5                       | 121.12                 |                        | 16.47                  |                        | 466.55                               |                        |           |
| 7/3/2019            | 7.71 | 1294            | 58.7                       | 124.66                 |                        | 23.50                  |                        | 469.42                               |                        | 1259.44   |
| 7/6/2019            | 7.92 | 1179            | 58.7                       | 122.08                 |                        | 16.07                  |                        | 457.15                               |                        | 1170.62   |
| 7/9/2019            | 7.73 | 1252            | 58.5                       | 123.39                 |                        | 16.49                  |                        | 462.74                               |                        | 1196.17   |
| 7/12/2019           | 7.84 | 1195            | 58.4                       | 123.99                 |                        | 16.65                  |                        | 472.74                               |                        | 1250.42   |
| 7/15/2019           | 7.09 | 1579            | 58.4                       | 122.56                 |                        | 16.56                  |                        | 475.70                               |                        | 1215.91   |
| 7/18/2019           | 7.88 | 1189            | 58.5                       | 120.42                 |                        | 16.27                  |                        | 468.69                               |                        | 1231.81   |
| 7/21/2019           | 7.75 | 1195            | 58.6                       | 117.49                 |                        | 16.35                  |                        | 464.59                               |                        | 1214.92   |
| 7/24/2019           | 7.77 | 1148            | 58.4                       | 121.11                 |                        | 16.39                  |                        | 462.24                               |                        | 1072.37   |
| 7/27/2019           | 7.23 | 1704            | 58.4                       | 120.02                 |                        | 17.30                  |                        | 481.74                               |                        | 1247.32   |
| 7/30/2019           | 7.49 | 1480            | 58.1                       | 115.90                 |                        | 17.46                  |                        | 488.15                               |                        | 1243.95   |
| 8/2/2019            | 7.08 | 1635            | 58.2                       | 124.58                 |                        | 17.62                  |                        | 476.10                               |                        | 1171.97   |
| 8/5/2019            | 6.63 | 1671            | 58.3                       | 124.79                 |                        | 17.12                  |                        | 479.06                               |                        | 1210.09   |
| 8/8/2019            | 6.57 | 1664            | 58.4                       | 123.53                 |                        | 17.98                  |                        | 472.01                               |                        | 1182.78   |
| 8/11/2019           | 7.19 | 1602            | 58.4                       | 124.74                 |                        | 17.60                  |                        | 476.10                               |                        | 1175.52   |
| 8/14/2019           | 6.66 | 1669            | 58.3                       | 122.52                 |                        | 17.19                  |                        | 456.86                               |                        | 1175.95   |
| 8/17/2019           | 7.22 | 1367            | 58.5                       | 123.15                 |                        | 17.54                  |                        | 474.85                               |                        | 1203.58   |
| 8/20/2019           | 6.49 | 1669            | 58.5                       | 122.08                 |                        | 19.17                  |                        | 470.73                               |                        | 1214.28   |
| 8/23/2019           | 6.89 | 1623            | 58.4                       | 122.91                 |                        | 17.20                  |                        | 476.25                               |                        | 1178.00   |
| 8/26/2019           | 6.51 | 1664            | 58.4                       | 122.41                 |                        | 16.95                  |                        | 493.32                               |                        | 1257.95   |
| 8/29/2019           | 6.96 | 1657            | 58.4                       | 122.04                 |                        | 16.92                  |                        | 473.02                               |                        | 1190.87   |
| 9/1/2019            | 6.65 | 1772            | 58.4                       | 120.28                 |                        | 16.84                  |                        | 456.65                               |                        | 1271.16   |
| 9/4/2019            | 6.77 | 1775            | 58.4                       | 121.08                 |                        | 16.93                  |                        | 460.84                               |                        | 1281.49   |
| 9/7/2019            | 6.66 | 1772            | 58.4                       | 120.72                 |                        | 16.94                  |                        | 460.68                               |                        | 1277.42   |
| 9/10/2019           | 6.81 | 1763            | 58.3                       | 120.77                 |                        | 16.72                  |                        | 459.31                               |                        | 1238.53   |
| 9/19/2019           | 6.64 | 1774            | 58.4                       | 121.14                 |                        | 16.61                  |                        | 460.87                               |                        | 1246.42   |
| 9/22/2019           | 6.7  | 1769            | 58.4                       | 119.27                 |                        | 16.65                  |                        | 453.85                               |                        | 1239.15   |
| 9/25/2019           | 6.64 | 1768            | 58.3                       | 119.95                 |                        | 16.47                  |                        | 457.95                               |                        | 1245.14   |
| 9/28/2019           | 6.72 | 1768            | 58.4                       | 119.60                 |                        | 16.55                  |                        | 457.58                               |                        | 1241.94   |
| 10/1/2019           | 6.84 | 1796            | 58.6                       | 127.37                 |                        | 17.61                  |                        | 471.29                               |                        | 1144.73   |
| 10/4/2019           | 6.81 | 1787            | 58.6                       | 126.33                 |                        | 17.43                  |                        | 467.68                               |                        | 1256.33   |
| 10/7/2019           | 6.79 | 1774            | 58.4                       | 126.78                 |                        | 17.38                  |                        | 469.11                               |                        | 1263.10   |
| 10/10/2019          | 6.83 | 1782            | 58.6                       | 124.90                 |                        | 17.17                  |                        | 461.17                               |                        | 1208.07   |
| 10/13/2019          | 6.78 | 1784            | 58.3                       | 126.58                 |                        | 17.34                  |                        | 468.30                               |                        | 1265.55   |
| 10/16/2019          | 6.77 | 1783            | 58.4                       | 124.99                 |                        | 17.46                  |                        | 462.87                               |                        | 1248.00   |
| 10/19/2019          | 6.75 | 1784            | 58.2                       | 127.14                 |                        | 17.49                  |                        | 471.04                               |                        | 1257.54   |
| 10/22/2019          | 6.82 | 1799            | 58.2                       | 124.44                 |                        | 17.37                  |                        | 459.14                               |                        | 1243.25   |

|            |      |      |      |        |       |                    |         |
|------------|------|------|------|--------|-------|--------------------|---------|
| 10/25/2019 | 6.74 | 1792 | 58.4 | 124.26 | 17.06 | 459.23             | 1242.65 |
| 10/28/2019 | 6.82 | 1806 | 58.4 | 126.43 | 17.38 | 468.35             | 1260.86 |
| 10/31/2019 | 6.76 | 1778 | 58.4 | 121.61 | 16.70 | 447.79             | 1215.72 |
| 11/3/2019  | 6.67 | 1812 | 58.3 | 126.58 | 17.54 | 460.53             | 1246.70 |
| 11/6/2019  | 6.74 | 1816 | 58.3 | 125.74 | 16.86 | 454.62             | 1231.07 |
| 11/9/2019  | 6.69 | 1833 | 58.4 | 126.78 | 16.48 | 447.59             | 1225.65 |
| 11/12/2019 | 6.76 | 1826 | 58.4 | 126.22 | 21.21 | 464.17             | 1253.41 |
| 11/15/2019 | 6.7  | 1845 | 58.3 | 125.82 | 17.12 | 462.10             | 1251.19 |
| 11/18/2019 | 6.98 | 1856 | 58.5 | 126.46 | 17.06 | 465.23             | 1255.29 |
| 11/21/2019 | 6.98 | 1824 | 58.3 | 128.56 | 17.42 | 471.50             | 1273.10 |
| 11/24/2019 | 6.72 | 1845 | 58.2 | 125.24 | 16.82 | 458.96             | 1243.42 |
| 11/27/2019 | 6.73 | 1841 | 58.2 | 124.68 | 16.63 | 457.27             | 1240.58 |
| 11/30/2019 |      |      | 58.4 | 126.67 | 16.92 | 464.94             | 1250.89 |
| 12/3/2019  | 6.63 | 1820 | 58.4 | 121.35 | 16.54 | 469.67             | 1245.41 |
| 12/6/2019  | 6.6  | 1812 | 58   | 121.38 | 16.45 | 466.44             | 1234.67 |
| 12/9/2019  | 6.58 | 1859 | 58.3 | 121.84 | 16.17 | 465.60             | 1232.90 |
| 12/12/2019 | 6.58 | 1818 | 58.1 | 121.26 | 16.25 | 465.40             | 1234.16 |
| 12/15/2019 | 6.53 | 1838 | 58.1 | 121.33 | 16.56 | 466.62             | 1234.33 |
| 12/18/2019 | 6.6  | 1851 | 58.1 | 122.69 | 16.71 | 472.03             | 1253.07 |
| 12/21/2019 | 6.77 | 1828 | 58.2 | 122.19 | 16.34 | 470.75             | 1241.02 |
| 12/24/2019 | 6.52 | 1828 | 58.2 | 123.11 | 17.27 | 473.80             | 1248.90 |
| 12/27/2019 | 6.55 | 1835 | 58.2 | 122.14 | 16.59 | 468.37             | 1246.93 |
| 12/30/2019 | 6.56 | 1842 | 58   | 122.14 | 16.58 | 468.39             | 1244.05 |
| 1/2/2020   | 7.09 | 1815 |      | 132.00 | 18.36 | 431.07             | 1270.43 |
| 1/5/2020   | 7.13 | 1823 |      | 124.98 | 18.46 | 510.74             | 1293.73 |
| 1/8/2020   | 7.09 | 1869 |      | 134.45 | 19.12 | 442.72             | 1294.53 |
| 1/11/2020  | 6.97 | 1943 |      | 131.23 | 18.94 | 438.72             | 1285.08 |
| 1/14/2020  | 6.99 | 1952 |      | 134.19 | 19.05 | 469.00             | 1318.60 |
| 1/17/2020  | 6.97 | 1946 |      | 132.63 | 18.54 | 402.88             | 1246.51 |
| 1/20/2020  | 7.09 | 1926 |      | 129.26 | 18.50 | 383.04             | 1212.12 |
| 1/23/2020  | 7.07 | 1932 |      | 131.32 | 18.50 | 425.07             | 1261.86 |
| 1/26/2020  | 7.23 | 1902 |      | 126.47 | 18.20 | 508.20             | 1329.29 |
| 1/29/2020  | 6.98 | 1946 |      | 128.99 | 18.75 | 513.74             | 1336.35 |
| 2/4/2020   | 6.99 | 1948 |      | 126.88 | 20.05 | 508.29             | 1334.43 |
| 2/7/2020   | 7.02 | 1931 |      | 128.97 | 18.96 | 507.27             | 1326.77 |
| 2/10/2020  | 7.05 | 1874 |      | 128.48 | 18.41 | 512.30             | 1342.11 |
| 2/13/2020  | 7.04 | 1952 |      | 129.60 | 18.64 | 522.15             | 1346.24 |
| 2/16/2020  | 6.87 | 1948 |      | 127.06 | 18.41 | 536.96             | 1358.22 |
| 2/19/2020  | 7.25 | 1743 |      | 129.74 | 18.66 | 517.56             | 1332.21 |
| 2/22/2020  | 7.21 | 1881 |      | 127.45 | 19.93 | 502.58 Joinspace 1 | 1322.70 |
| 2/25/2020  | 7.1  | 1945 |      | 128.12 | 18.43 | 512.22             | 1324.53 |
| 2/28/2020  | 6.88 | 1945 |      | 127.27 | 19.33 | 511.82             | 1329.95 |
| 3/2/2020   | 6.78 | 1966 |      | 117.56 | 16.74 | 458.96 Joinspace 2 | 1241.50 |
| 3/5/2020   | 7.07 | 1744 |      | 128.33 | 18.39 | 522.82             | 1340.30 |
| 3/8/2020   | 6.86 | 1953 |      | 127.83 | 19.03 | 513.94             | 1344.38 |
| 3/11/2020  | 7.07 | 1956 |      | 127.16 | 18.76 | 507.10             | 1335.03 |
| 3/14/2020  | 7.21 | 1928 |      | 120.12 | 18.13 | 477.87             | 1268.16 |
| 3/17/2020  | 7.26 | 1917 |      | 125.19 | 17.94 | 513.45             | 1320.73 |
| 3/20/2020  | 6.9  | 1975 |      | 130.73 | 18.85 | 518.44             | 1347.25 |
| 3/23/2020  | 6.87 | 1945 |      | 127.32 | 18.88 | 508.62             | 1331.87 |
| 3/26/2020  | 6.93 | 1947 |      | 122.47 | 17.86 | 486.07             | 1297.86 |
| 3/29/2020  | 6.88 | 1948 |      | 129.01 | 19.46 | 509.52             | 1335.10 |
| 4/1/2020   | 6.81 | 1945 |      | 127.02 | 18.31 | 532.69             | 1350.09 |
| 4/4/2020   | 7.01 | 1823 |      | 128.55 | 19.07 | 520.66             | 1344.51 |
| 4/7/2020   | 6.81 | 1937 |      | 127.39 | 18.39 | 515.43             | 1333.54 |
| 4/10/2020  | 7.06 | 1732 |      | 127.91 | 18.71 | 548.63             | 1349.32 |
| 4/13/2020  | 6.82 | 1942 |      | 127.23 | 17.86 | 512.65             | 1337.84 |
| 4/16/2020  | 7.07 | 1946 |      | 127.43 | 18.38 | 535.13             | 1351.92 |
| 4/19/2020  | 7.01 | 1919 |      | 126.64 | 18.26 | 506.90             | 1325.60 |
| 4/22/2020  | 6.87 | 1932 |      | 129.15 | 19.90 | 512.90             | 1331.70 |
| 4/25/2020  | 6.93 | 1924 |      | 126.46 | 17.97 | 504.59             | 1325.36 |
| 4/28/2020  | 6.85 | 1927 |      | 127.51 | 18.53 | 517.62             | 1341.97 |
| 5/1/2020   | 6.73 | 1946 |      | 128.19 | 18.22 | 511.91             | 1332.21 |
| 5/4/2020   | 7.1  | 1805 |      | 123.68 | 18.63 | 557.32             | 1379.97 |
| 5/7/2020   | 6.76 | 1952 |      | 126.26 | 18.25 | 504.75             | 1317.70 |
| 5/10/2020  | 6.83 | 1958 |      | 128.42 | 18.47 | 510.90             | 1326.48 |

|            |      |      |    |                    |       |        |                     |
|------------|------|------|----|--------------------|-------|--------|---------------------|
| 5/13/2020  | 6.73 | 1942 |    | 126.23             | 18.28 | 504.87 | 1325.95             |
| 5/16/2020  | 6.75 | 1942 |    | 126.53             | 17.93 | 526.80 | 1356.87             |
| 5/19/2020  | 6.7  | 1896 |    | 126.59             | 18.32 | 497.75 | 1318.53             |
| 5/22/2020  | 6.66 | 1943 |    | 126.34             | 18.48 | 520.50 | 1335.23             |
| 5/25/2020  | 6.63 | 1941 |    | 126.93             | 18.65 | 515.96 | 1299.21             |
| 5/28/2020  | 6.65 | 1917 |    | 126.46             | 19.61 | 508.73 | 1322.01             |
| 5/31/2020  | 6.73 | 1947 |    | 129.54             | 19.13 | 525.11 | 1347.43             |
| 6/3/2020   | 6.7  | 1929 |    | 125.10             | 17.80 | 519.27 | 1330.75             |
| 6/6/2020   | 6.72 | 1931 |    | 126.10             | 18.03 | 503.52 | 1320.55 Joinpoint 1 |
| 6/9/2020   | 6.65 | 1930 |    | 121.46             | 17.78 | 494.45 | 1287.81             |
| 6/12/2020  | 6.75 | 1926 |    | 121.95             | 18.28 | 499.46 | 1296.64             |
| 6/15/2020  | 6.93 | 1919 |    | 126.37             | 18.14 | 504.24 | 1317.23             |
| 6/18/2020  | 6.8  | 1912 |    | 126.43             | 19.43 | 516.50 | 1297.79             |
| 6/21/2020  | 6.75 | 1912 |    | 124.48 Joinpoint 1 | 18.23 | 514.57 | 1314.63             |
| 6/24/2020  | 6.69 | 1921 |    | 127.04             | 18.17 | 528.80 | 1321.03             |
| 6/27/2020  | 6.69 | 1918 |    | 125.24             | 18.37 | 521.49 | 1331.89             |
| 6/30/2020  | 6.76 | 1915 |    | 126.90             | 18.63 | 502.35 | 1310.59             |
| 7/3/2020   | 6.63 | 1917 |    | 126.02             | 17.97 | 504.36 | 1315.72             |
| 7/6/2020   | 6.65 | 1920 |    | 125.68             | 17.79 | 509.83 | 1301.63             |
| 7/9/2020   | 6.64 | 1924 |    | 118.81             | 17.06 | 474.15 | 1254.84             |
| 7/12/2020  | 6.69 | 1925 |    | 124.64             | 17.72 | 495.55 | 1303.09             |
| 7/15/2020  | 6.71 | 1932 |    | 125.77             | 17.94 | 511.51 | 1317.42             |
| 7/18/2020  | 6.66 | 1930 |    | 126.10             | 18.11 | 505.43 | 1308.55             |
| 7/21/2020  | 6.66 | 1924 |    | 126.43             | 18.07 | 503.12 | 1328.78             |
| 7/24/2020  | 6.69 | 1953 |    | 129.04             | 19.21 | 514.62 | 1335.28             |
| 7/27/2020  | 6.9  | 1919 |    | 121.29             | 18.03 | 503.99 | 1284.34             |
| 7/30/2020  | 6.72 | 1913 |    | 121.18             | 17.68 | 485.08 | 1286.41             |
| 8/2/2020   | 6.74 | 1906 |    | 120.54             | 18.16 | 457.26 | 1253.83             |
| 8/5/2020   | 6.73 | 1910 |    | 118.96             | 16.36 | 454.35 | 1228.28             |
| 8/8/2020   | 6.75 | 1918 |    | 122.32             | 17.80 | 463.71 | 1239.38             |
| 8/11/2020  | 7.15 | 1672 |    | 120.93             | 16.61 | 459.36 | 1259.22             |
| 8/14/2020  | 6.73 | 1903 |    | 120.86             | 16.72 | 462.07 | 1252.65             |
| 8/17/2020  | 6.72 | 1907 |    | 118.16             | 17.62 | 447.82 | 1233.86             |
| 8/20/2020  | 6.73 | 1909 |    | 121.20             | 17.92 | 462.09 | 1256.57             |
| 9/1/2020   | 6.71 | 1903 |    | 121.31             | 16.17 | 457.20 | 1243.79             |
| 9/4/2020   | 6.72 | 1903 |    | 119.64             | 17.38 | 459.55 | 1247.77             |
| 9/7/2020   | 6.78 | 1901 |    | 122.71             | 17.86 | 461.95 | 1254.08             |
| 9/10/2020  | 6.71 | 1905 |    | 119.73             | 16.86 | 458.13 | 1242.83             |
| 9/13/2020  | 6.69 | 1894 |    | 121.06             | 16.83 | 457.10 | 1243.66             |
| 9/16/2020  | 6.72 | 1912 |    | 124.49             | 17.95 | 466.27 | 1258.62             |
| 9/19/2020  | 6.67 | 1907 |    | 124.21             | 18.24 | 461.06 | 1255.64             |
| 9/22/2020  | 7.77 | 1382 |    | 123.10             | 16.72 | 463.95 | 1247.57             |
| 9/25/2020  | 6.86 | 1911 |    | 120.10             | 17.80 | 456.03 | 1251.69             |
| 9/28/2020  | 6.78 | 1890 |    | 119.35             | 15.98 | 450.75 | 1230.19             |
| 10/1/2020  | 6.69 | 1910 |    | 119.55             | 16.45 | 460.47 | 1242.51             |
| 10/4/2020  | 6.78 | 1914 |    | 120.99             | 16.48 | 458.61 | 1255.16             |
| 10/7/2020  | 7.51 | 1610 |    | 121.89             | 17.88 | 458.26 | 1251.16             |
| 10/10/2020 | 6.64 | 1910 |    | 121.68             | 17.51 | 460.44 | 1250.95             |
| 10/13/2020 | 6.62 | 1911 |    | 120.30             | 17.10 | 463.03 | 1252.20             |
| 10/16/2020 | 6.64 | 1906 |    | 121.75             | 16.29 | 458.89 | 1245.95             |
| 10/19/2020 | 6.68 | 1895 |    | 120.90             | 16.36 | 460.98 | 1242.85             |
| 10/22/2020 | 6.64 | 1896 |    | 121.71             | 17.57 | 460.53 | 1250.02             |
| 10/25/2020 | 7.17 | 1970 |    | 120.75             | 18.13 | 458.57 | 1247.33             |
| 10/28/2020 | 6.66 | 1915 |    | 121.61             | 16.71 | 462.62 | 1252.41             |
| 10/31/2020 | 6.62 | 1920 | 57 | 120.51             | 18.77 | 462.76 | 1253.23             |
| 11/3/2020  | 6.88 | 1908 | 56 | 119.00             | 18.22 | 464.00 | 1257.31             |
| 11/6/2020  | 6.64 | 1930 | 56 | 121.34             | 17.86 | 464.20 | 1272.45             |
| 11/9/2020  | 6.61 | 1919 | 57 | 121.87             | 16.30 | 455.95 | 1251.16             |
| 11/12/2020 | 6.63 | 1908 | 56 | 121.30             | 16.35 | 459.49 | 1256.66             |
| 11/15/2020 | 7.46 | 1873 | 56 | 121.55             | 18.23 | 457.15 | 1258.33             |
| 11/18/2020 | 6.69 | 1913 | 56 | 120.29             | 18.15 | 457.87 | 1244.29             |
| 11/21/2020 | 6.71 | 1908 | 56 | 121.18             | 18.21 | 460.74 | 1255.40             |
| 11/24/2020 | 7.18 | 1858 | 56 | 120.72             | 16.35 | 451.45 | 1227.82             |
| 11/27/2020 | 7.06 | 1910 | 57 | 121.70             | 18.09 | 461.53 | 1255.41             |
| 11/30/2020 | 6.6  | 1911 | 57 | 120.48             | 17.92 | 458.34 | 1242.35             |

|            |      |      |      |                    |                   |                    |                     |
|------------|------|------|------|--------------------|-------------------|--------------------|---------------------|
| 12/3/2020  | 7.56 | 1722 | 56   | 125.76             | 20.43             | 475.05             | 1281.30             |
| 12/6/2020  | 7.4  | 1261 | 57   | 60.35              | 8.23              | 336.10             | 873.84              |
| 12/9/2020  | 7.13 | 1772 | 57   | 127.20             | 21.29             | 485.34             | 1316.95             |
| 12/12/2020 | 7.26 | 1259 | 56   | 61.28              | 8.29              | 323.85             | 870.56              |
| 12/18/2020 | 6.93 | 1791 | 57   | 127.83             | 19.13             | 491.75             | 1339.72             |
| 12/21/2020 | 7.29 | 1791 | 56   | 128.37             | 21.30             | 493.53             | 1344.29             |
| 12/24/2020 | 6.93 | 1460 | 57   | 86.55              | 12.56             | 362.56             | 1015.24             |
| 12/27/2020 | 7.31 | 1390 | 57   | 80.57              | 11.00             | 348.84             | 972.54              |
| 12/30/2020 | 6.77 | 1793 | 57   | 127.29             | 20.52             | 488.26             | 1369.09             |
| 1/2/2021   | 6.73 | 1802 | 57   | 127.41             | 23.53             | 488.99             | 1344.59             |
| 1/5/2021   | 7.2  | 1795 | 56   | 128.65 Joinpoint 2 | 21.84             | 492.26             | 1349.33             |
| 1/8/2021   | 6.81 | 1797 | 56   | 127.74             | 20.49             | 490.87             | 1342.16             |
| 1/11/2021  | 6.76 | 1803 | 56   | 128.72             | 22.93             | 495.20 Joinpoint 3 | 1335.91             |
| 1/14/2021  | 6.95 | 1793 | 56   | 127.37             | 21.65             | 490.81             | 1339.56             |
| 1/17/2021  | 6.76 | 1801 | 55   | 128.59             | 23.94             | 494.35             | 1353.85             |
| 1/20/2021  | 6.82 | 1799 | 55   | 128.19             | 22.06             | 494.62             | 1346.01             |
| 1/23/2021  | 6.73 | 1798 | 56   | 128.01             | 22.56 Joinpoint 1 | 493.41             | 1342.28 Joinpoint 2 |
| 1/26/2021  | 6.88 | 1799 | 56   | 128.41             | 21.20             | 493.65             | 1341.48             |
| 1/29/2021  | 6.79 | 1794 | 56   | 127.79             | 21.74             | 491.08             | 1347.94             |
| 2/1/2021   | 6.72 | 1793 | 56   | 126.07             | 18.65 Joinpoint 2 | 442.98             | 1264.72 Joinpoint 3 |
| 2/4/2021   | 6.69 | 1792 | 56   | 125.94             | 20.97             | 442.49             | 1265.36             |
| 2/7/2021   | 6.72 | 1792 | 56   | 126.18             | 16.75             | 442.51             | 1274.69             |
| 2/10/2021  | 6.74 | 1792 | 56   | 125.59             | 17.22             | 440.03             | 1270.08             |
| 2/13/2021  | 6.74 | 1795 | 56   | 125.81             | 19.21             | 440.87             | 1276.94             |
| 2/16/2021  | 6.67 | 1794 | 56   | 126.18             | 17.58             | 442.79             | 1272.39             |
| 2/19/2021  | 6.65 | 1792 | 56   | 125.80             | 16.74             | 439.87             | 1268.46             |
| 2/22/2021  | 6.69 | 1788 | 57   | 125.52             | 18.21             | 439.69             | 1270.52             |
| 2/25/2021  | 6.69 | 1786 | 57   | 125.22             | 16.60             | 438.56             | 1225.31             |
| 2/28/2021  | 6.72 | 1792 | 56   | 126.09             | 17.31             | 440.32             | 1270.73             |
| 3/3/2021   | 6.61 | 1805 | 56   | 123.74             | 17.81             | 472.51             | 1325.91             |
| 3/6/2021   | 6.55 | 1804 | 56   | 122.85             | 17.71             | 469.87             | 1318.81             |
| 3/9/2021   | 6.58 | 1815 | 56   | 124.43             | 18.01             | 472.22             | 1323.51             |
| 3/12/2021  | 6.65 | 1811 | 56   | 123.81             | 18.45             | 473.24             | 1318.88             |
| 3/15/2021  | 6.57 | 1819 | 55   | 124.51             | 19.27             | 473.61             | 1319.10             |
| 3/18/2021  | 6.54 | 1815 | 56   | 125.05             | 18.58             | 477.84             | 1327.00             |
| 3/21/2021  | 6.57 | 1817 | 56   | 122.70             | 17.86             | 471.60             | 1322.11             |
| 3/24/2021  | 6.63 | 1801 | 56   | 122.07             | 17.92             | 475.07             | 1325.36             |
| 3/27/2021  | 6.53 | 1823 | 56   | 124.61             | 19.85             | 470.44             | 1323.65             |
| 3/30/2021  | 6.58 | 1803 | 55   | 122.64             | 18.01             | 470.60             | 1312.02             |
| 5/2/2021   | 7.28 | 1624 | 56   | 124.26             | 18.92             | 458.25             | 1305.23             |
| 5/5/2021   | 7.53 | 1509 | 55.8 | 127.62             | 19.70             | 470.65             | 1253.88             |
| 5/8/2021   | 7.31 | 1626 | 56.7 | 125.15             | 18.64             | 462.33             | 1349.12             |
| 5/11/2021  | 7.62 | 1495 | 56.8 | 126.64             | 18.22             | 468.13             | 1291.18             |
| 5/14/2021  | 7.17 | 1678 | 56.8 | 124.53             | 18.89             | 457.59             | 1386.35             |
| 5/17/2021  | 7.27 | 1753 | 56.7 | 125.89             | 19.12             | 465.63             | 1382.18             |
| 5/20/2021  | 7.18 | 1638 | 56.8 | 129.13             | 20.60             | 473.89             | 1402.31             |
| 5/23/2021  | 7.18 | 1792 | 57   | 124.56             | 18.85             | 460.56             | 1363.46             |
| 5/26/2021  | 7.16 | 1798 | 58   | 125.12             | 19.20             | 463.02             | 1356.76             |
| 5/29/2021  | 7.13 | 1800 | 57   | 122.90             | 19.04             | 451.13             | 1344.41             |
| 6/1/2021   | 7.18 | 1603 | 57.2 | 89.38              | 16.77             | 341.20             | 1056.17             |
| 6/4/2021   | 7.2  | 1660 | 57   | 130.20             | 21.36             | 542.52             | 1463.82             |
| 6/7/2021   | 7.17 | 1648 | 56.8 | 124.19             | 21.07             | 516.64             | 1401.43             |
| 6/10/2021  | 7.43 | 1754 | 56.7 | 128.88             | 20.93             | 534.40             | 1453.23             |
| 6/13/2021  | 7.24 | 1664 | 57   | 124.92             | 20.18             | 516.64             | 1431.88             |
| 6/16/2021  | 7.3  | 1754 | 56.8 | 125.94             | 20.89             | 517.46             | 1429.41             |
| 6/19/2021  | 7.3  | 1745 | 56.9 | 127.87             | 20.96             | 525.18             | 1431.72             |
| 6/22/2021  | 7.28 | 1773 | 57.2 | 124.21             | 20.31             | 511.38             | 1428.18             |
| 6/25/2021  | 7.29 | 1773 | 57   | 125.06             | 20.52             | 516.09             | 1381.00             |
| 6/28/2021  | 7.2  | 1770 | 57   | 125.08             | 21.13             | 517.74             | 1440.41             |

|           |      |      |      |        |       |        |         |
|-----------|------|------|------|--------|-------|--------|---------|
| 7/1/2021  | 7.25 | 1652 | 56.8 | 131.66 | 18.87 | 487.27 | 1253.91 |
| 7/4/2021  | 7.22 | 1678 | 57.5 | 128.71 | 19.35 | 495.66 | 1306.19 |
| 7/7/2021  | 7.31 | 1713 | 57.2 | 129.17 | 19.18 | 473.68 | 1303.53 |
| 7/10/2021 | 7.37 | 1739 | 57.4 | 126.37 | 18.81 | 487.64 | 1318.22 |
| 7/13/2021 | 7.34 | 1793 | 57.4 | 130.66 | 21.47 | 504.23 | 1367.03 |
| 7/16/2021 | 7.28 | 1778 | 57.3 | 129.09 | 19.46 | 495.24 | 1368.70 |
| 7/19/2021 | 7.18 | 1795 | 57.2 | 131.76 | 19.99 | 507.00 | 1392.97 |
| 7/21/2021 | 7.13 | 1794 | 57.3 | 133.75 | 20.62 | 515.35 | 1420.27 |
| 7/24/2021 | 7.08 | 1800 | 57   | 131.71 | 19.66 | 509.85 | 1358.68 |
| 7/27/2021 | 6.95 | 1787 | 57   | 129.88 | 19.34 | 503.36 | 1340.74 |
| 7/30/2021 | 6.83 | 1784 | 57   | 135.80 | 19.23 | 505.60 | 1373.82 |

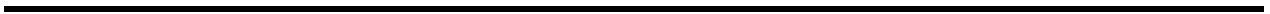

| Qujiang spring(S9) |      |            |                |                         |                        |                        |                        |                                      |                        |           |                        |
|--------------------|------|------------|----------------|-------------------------|------------------------|------------------------|------------------------|--------------------------------------|------------------------|-----------|------------------------|
| Date(yyyy/mm/dd)   | pH   | EC(μs/cm ) | Temperature(℃) | Na <sup>+</sup> (mg/L ) | CP detection Joinpoint | Cl <sup>-</sup> (mg/L) | CP detection Joinpoint | SO <sub>4</sub> <sup>2-</sup> (mg/L) | CP detection Joinpoint | TDS(mg/L) | CP detection Joinpoint |
| 4/29/2019          | 8.14 | 1115       |                | 265.39                  |                        | 5.62                   |                        | 21.97                                |                        | 570.84    |                        |
| 5/2/2019           | 8.11 | 1113       |                |                         |                        |                        |                        |                                      |                        |           |                        |
| 5/5/2019           | 8.04 | 1110       |                |                         |                        |                        |                        |                                      |                        |           |                        |
| 5/8/2019           | 8.12 | 1102       |                |                         |                        |                        |                        |                                      |                        |           |                        |
| 5/11/2019          | 8.14 | 1108       |                |                         |                        |                        |                        |                                      |                        |           |                        |
| 5/14/2019          | 8.05 | 1108       |                |                         |                        |                        |                        |                                      |                        |           |                        |
| 5/17/2019          | 8.01 | 1111       |                |                         |                        |                        |                        |                                      |                        |           |                        |
| 5/20/2019          | 7.96 | 1106       |                |                         |                        |                        |                        |                                      |                        |           |                        |
| 5/23/2019          | 7.93 | 1112       |                |                         |                        |                        |                        |                                      |                        |           |                        |
| 5/26/2019          | 7.8  | 1111       |                |                         |                        |                        |                        |                                      |                        |           |                        |
| 5/29/2019          | 7.21 | 1114       |                |                         |                        |                        |                        |                                      |                        |           |                        |
| 6/1/2019           | 7.45 | 1112       | 60.65          | 254.25                  |                        | 4.78                   |                        | 20.24                                |                        | 562.96    |                        |
| 6/4/2019           | 7.15 | 1113       | 60.85          | 265.98                  |                        | 5.90                   |                        | 20.82                                |                        | 590.98    |                        |
| 6/7/2019           | 7.08 | 1120       | 60.72          | 265.48                  |                        | 5.37                   |                        | 20.87                                |                        | 598.38    |                        |
| 6/10/2019          | 7.12 | 1112       | 61.02          | 268.37                  |                        | 5.33                   |                        | 21.25                                |                        | 607.12    |                        |
| 6/13/2019          | 7.14 | 1093       | 60.22          | 273.09                  |                        | 5.34                   |                        | 21.55                                |                        | 614.07    |                        |
| 6/16/2019          | 7.2  | 1109       | 60.31          | 264.25                  |                        | 5.40                   |                        | 20.80                                |                        | 578.36    |                        |
| 6/19/2019          | 6.88 | 1097       | 60.11          | 268.85                  |                        | 5.78                   |                        | 21.54                                |                        | 562.36    |                        |
| 6/21/2019          | 7    | 1110       | 60.67          | 264.22                  |                        | 4.96                   |                        | 20.62                                |                        | 538.70    |                        |
| 6/24/2019          | 7.17 | 1106       | 60.53          | 265.18                  |                        | 5.12                   |                        | 20.85                                |                        | 599.30    |                        |
| 6/27/2019          | 7.22 | 1111       | 60.82          | 269.13                  |                        | 5.27                   |                        | 21.09                                |                        | 523.37    |                        |
| 6/30/2019          | 7.23 | 1110       | 60.37          | 248.18                  |                        | 5.16                   |                        | 20.27                                |                        | 561.15    |                        |
| 7/3/2019           | 7.24 | 1115       | 60.77          | 254.48                  |                        | 5.65                   |                        | 22.52                                |                        | 605.10    |                        |
| 7/6/2019           | 7.2  | 1113       | 60.81          | 257.24                  |                        | 5.46                   |                        | 22.51                                |                        | 634.09    |                        |
| 7/9/2019           | 6.93 | 1104       | 60.5           | 256.40                  |                        | 5.22                   |                        | 22.40                                |                        | 600.80    |                        |
| 7/12/2019          | 8.12 | 1105       | 60.3           | 255.69                  |                        | 5.21                   |                        | 22.26                                |                        | 601.16    |                        |
| 7/15/2019          | 7.18 | 1110       | 60.84          | 264.97                  |                        | 4.68                   |                        | 20.27                                |                        | 617.11    |                        |
| 7/18/2019          | 7.2  | 1112       | 60.82          | 252.33                  |                        | 5.24                   |                        | 22.23                                |                        | 575.17    |                        |
| 7/21/2019          | 7.18 | 1111       | 60.35          | 243.36                  |                        | 4.98                   |                        | 21.29                                |                        | 580.21    |                        |
| 7/24/2019          | 7.16 | 1115       | 60.3           | 247.73                  |                        | 5.10                   |                        | 21.71                                |                        | 550.69    |                        |
| 7/27/2019          | 7.12 | 1115       | 61.05          | 248.89                  |                        | 5.23                   |                        | 22.05                                |                        | 580.83    |                        |
| 7/30/2019          | 6.66 | 1026       | 61.04          | 242.70                  |                        | 5.28                   |                        | 21.42                                |                        | 544.41    |                        |
| 8/2/2019           | 6.69 | 1024       | 61.36          | 264.23                  |                        | 5.34                   |                        | 22.93                                |                        | 636.06    |                        |
| 8/5/2019           | 7.04 | 1042       | 61.35          | 251.18                  |                        | 4.72                   |                        | 20.49                                |                        | 600.26    |                        |
| 8/8/2019           | 7.02 | 1033       | 61.55          | 263.19                  |                        | 5.76                   |                        | 22.98                                |                        | 614.34    |                        |
| 8/11/2019          | 7.06 | 1033       | 61.61          | 272.72                  |                        | 5.41                   |                        | 22.61                                |                        | 618.62    |                        |
| 8/13/2019          | 6.93 | 1035       | 61.62          | 265.29                  |                        | 5.43                   |                        | 21.15                                |                        | 622.98    |                        |
| 8/16/2019          | 6.82 | 1040       | 61.41          | 264.93                  |                        | 4.87                   |                        | 21.41                                |                        | 618.69    |                        |
| 8/19/2019          | 6.65 | 1026       | 61.57          | 278.92                  |                        | 5.35                   |                        | 22.77                                |                        | 630.65    |                        |
| 8/22/2019          | 6.74 | 1031       | 61.38          | 276.72                  |                        | 4.93                   |                        | 20.44                                |                        | 619.25    |                        |
| 8/25/2019          | 6.62 | 1029       | 61.15          | 260.89                  |                        | 5.00                   |                        | 20.91                                |                        | 612.81    |                        |
| 8/28/2019          | 6.82 | 1041       | 60.03          | 260.82                  |                        | 5.02                   |                        | 20.79                                |                        | 616.49    |                        |
| 9/3/2019           | 6.96 | 1116       | 61.01          | 268.68                  |                        | 5.01                   |                        | 21.25                                |                        | 588.10    |                        |
| 9/6/2019           | 6.96 | 1119       | 60.91          | 268.06                  |                        | 4.91                   |                        | 20.92                                |                        | 620.30    |                        |
| 9/9/2019           | 7.03 | 1131       | 61.02          | 268.70                  |                        | 5.22                   |                        | 21.21                                |                        | 620.65    |                        |
| 9/12/2019          | 6.79 | 1107       | 61.23          | 253.98                  |                        | 4.66                   |                        | 19.95                                |                        | 600.08    |                        |
| 9/15/2019          | 6.82 | 1112       | 60.96          | 265.94                  |                        | 4.95                   |                        | 20.88                                |                        | 602.21    |                        |
| 9/18/2019          | 7.1  | 1111       | 60.87          | 264.83                  |                        | 4.96                   |                        | 21.00                                |                        | 606.30    |                        |
| 9/21/2019          | 7.08 | 1115       | 60.88          | 271.22                  |                        | 5.44                   |                        | 21.50                                |                        | 598.07    |                        |
| 9/24/2019          | 7.07 | 1117       | 60.67          | 269.53                  |                        | 5.06                   |                        | 21.23                                |                        | 617.54    |                        |
| 9/27/2019          | 7.09 | 1121       | 60.87          | 270.17                  |                        | 5.04                   |                        | 21.10                                |                        | 617.35    |                        |
| 9/30/2019          | 7.09 | 1113       | 60.81          | 268.14                  |                        | 5.02                   |                        | 21.16                                |                        | 611.54    |                        |
| 10/3/2019          | 7.14 | 1096       | 61.26          | 263.55                  |                        | 4.96                   |                        | 21.11                                |                        | 671.83    |                        |
| 10/6/2019          | 7.04 | 1102       | 60.77          | 264.58                  |                        | 4.90                   |                        | 21.48                                |                        | 663.76    |                        |
| 10/9/2019          | 7.29 | 1108       | 60.69          | 273.86                  |                        | 5.24                   |                        | 21.92                                |                        | 676.98    |                        |
| 10/12/2019         | 7.36 | 1123       | 50.53          | 272.79                  |                        | 5.10                   |                        | 21.73                                |                        | 676.01    |                        |
| 10/15/2019         | 7.33 | 1107       | 60.25          | 270.65                  |                        | 5.26                   |                        | 21.55                                |                        | 626.68    |                        |
| 10/18/2019         | 7.3  | 1100       | 60.22          | 271.23                  |                        | 5.32                   |                        | 21.72                                |                        | 664.80    |                        |
| 10/21/2019         | 7.2  | 1102       | 61.09          | 272.45                  |                        | 5.27                   |                        | 21.95                                |                        | 609.74    |                        |

|            |      |      |       |        |      |       |                    |
|------------|------|------|-------|--------|------|-------|--------------------|
| 10/24/2019 | 6.95 | 1100 | 60.66 | 270.86 | 5.07 | 21.68 | 628.85             |
| 10/27/2019 | 6.93 | 1097 | 60.51 | 270.16 | 5.29 | 21.23 | 627.19             |
| 10/30/2019 | 6.96 | 1095 | 60.23 | 269.67 | 5.09 | 21.62 | 665.43             |
| 11/1/2019  | 7.15 | 1132 | 60.87 | 272.49 | 5.19 | 22.19 | 679.88             |
| 11/4/2019  | 7.16 | 1132 | 60.48 | 274.01 | 4.92 | 22.34 | 684.22             |
| 11/7/2019  | 7.2  | 1140 | 60.43 | 268.60 | 5.31 | 21.70 | 637.32             |
| 11/10/2019 | 7.21 | 1165 | 60.14 | 274.75 | 5.09 | 22.19 | 682.61             |
| 11/13/2019 | 7.12 | 1168 | 60.38 | 274.40 | 4.92 | 22.14 | 678.27             |
| 11/16/2019 | 6.79 | 1147 | 60.5  | 271.89 | 5.11 | 21.84 | 672.52             |
| 11/19/2019 | 7.26 | 1151 | 61.19 | 273.44 | 4.82 | 21.78 | 668.52             |
| 11/22/2019 | 7.26 | 1176 | 60.42 | 280.83 | 5.01 | 22.64 | 692.65             |
| 11/25/2019 | 7.14 | 1163 | 60.2  | 275.52 | 4.92 | 22.04 | 679.82             |
| 11/28/2019 | 7.19 | 1169 | 60.47 | 270.75 | 5.09 | 21.53 | 670.36             |
| 12/1/2019  | 6.99 | 1115 | 60.07 | 258.12 | 4.80 | 21.00 | 666.81             |
| 12/4/2019  | 7.17 | 1130 | 60.14 | 262.41 | 5.53 | 21.33 | 673.25             |
| 12/7/2019  | 6.65 | 1134 | 60.03 | 253.82 | 4.86 | 20.35 | 654.00             |
| 12/10/2019 | 6.63 | 1129 | 60.09 | 254.34 | 4.79 | 20.33 | 658.63             |
| 12/13/2019 | 7.03 | 1143 | 60.41 | 257.55 | 5.23 | 20.68 | 658.75             |
| 12/16/2019 | 7.05 | 1143 | 60.26 | 260.33 | 5.08 | 20.96 | 661.64             |
| 12/19/2019 | 7.12 | 1145 | 60.05 | 259.96 | 5.01 | 20.85 | 660.35             |
| 12/22/2019 | 6.94 | 1120 | 60.49 | 261.58 | 5.26 | 20.96 | 664.62             |
| 12/25/2019 | 7.06 | 1126 | 60.64 | 262.08 | 4.91 | 21.21 | 667.95             |
| 12/28/2019 | 6.79 | 1132 | 60.2  | 258.45 | 4.80 | 20.46 | 655.27             |
| 12/31/2019 | 6.76 | 1131 | 60.37 | 256.73 | 4.81 | 21.11 | 653.77             |
| 1/3/2020   | 7.36 | 1163 |       | 281.84 | 5.64 | 19.13 | 684.10             |
| 1/6/2020   | 7.31 | 1186 |       | 283.50 | 5.58 | 21.34 | 693.46             |
| 1/9/2020   | 7.54 | 1223 |       | 286.38 | 6.31 | 19.70 | 701.60             |
| 1/12/2020  | 7.33 | 1187 |       | 282.83 | 5.53 | 19.14 | 682.07             |
| 1/15/2020  | 7.28 | 1187 |       | 282.95 | 5.82 | 19.41 | 688.17             |
| 1/18/2020  | 7.04 | 1197 |       | 280.45 | 5.61 | 19.06 | 690.89             |
| 1/21/2020  | 7.08 | 1193 |       | 268.31 | 5.11 | 17.51 | 667.35             |
| 1/24/2020  | 7.08 | 1191 |       | 283.98 | 5.72 | 18.50 | 687.50             |
| 1/27/2020  | 7.16 | 1181 |       | 289.72 | 5.61 | 18.67 | 698.52             |
| 1/30/2020  | 7.37 | 1187 |       | 286.18 | 5.73 | 19.26 | 700.14 Joinpoint 1 |
| 2/2/2020   | 7.26 | 1194 |       | 280.93 | 5.52 | 18.76 | 689.92             |
| 2/5/2020   | 7.37 | 1192 |       | 283.66 | 6.16 | 19.27 | 705.57             |
| 2/8/2020   | 7.28 | 1188 |       | 275.82 | 5.27 | 18.56 | 670.95             |
| 2/11/2020  | 7.36 | 1191 |       | 284.10 | 7.06 | 18.80 | 710.23             |
| 2/14/2020  | 7.31 | 1173 |       | 278.47 | 5.39 | 18.87 | 686.26             |
| 2/17/2020  | 7.26 | 1177 |       | 279.40 | 5.33 | 18.68 | 677.71             |
| 2/20/2020  | 7.02 | 1176 |       | 285.63 | 5.41 | 20.98 | 698.93             |
| 2/23/2020  | 7.03 | 1167 |       | 283.12 | 5.54 | 18.54 | 687.54             |
| 2/26/2020  | 7.32 | 1168 |       | 286.30 | 5.83 | 18.94 | 698.55             |
| 2/29/2020  | 7.28 | 1184 |       | 268.57 | 5.26 | 18.19 | 677.85             |
| 3/3/2020   | 7.19 | 1185 |       | 284.96 | 5.60 | 18.89 | 691.42             |
| 3/6/2020   | 7.13 | 1182 |       | 284.76 | 5.78 | 18.95 | 689.80             |
| 3/9/2020   | 7.19 | 1184 |       | 284.99 | 5.55 | 21.70 | 689.64             |
| 3/12/2020  | 6.97 | 1172 |       | 277.45 | 5.20 | 18.35 | 681.81             |
| 3/15/2020  | 6.97 | 1175 |       | 279.94 | 5.45 | 19.89 | 658.28             |
| 3/18/2020  | 6.97 | 1192 |       | 290.96 | 5.43 | 21.41 | 699.91             |
| 3/21/2020  | 7.19 | 1195 |       | 283.31 | 5.87 | 18.78 | 701.30             |
| 3/24/2020  | 7.22 | 1202 |       | 286.38 | 6.09 | 19.02 | 707.90             |
| 3/27/2020  | 7.15 | 1184 |       | 278.26 | 5.52 | 18.44 | 668.54             |
| 3/30/2020  | 8.33 | 1187 |       | 284.83 | 5.67 | 18.45 | 695.26             |
| 4/2/2020   | 6.92 | 1192 | 61.08 | 281.41 | 5.56 | 20.33 | 700.39             |
| 4/5/2020   | 6.87 | 1187 | 60.98 | 279.69 | 5.26 | 17.94 | 684.50             |
| 4/8/2020   | 6.9  | 1190 | 61.12 | 281.54 | 5.85 | 20.90 | 696.89             |
| 4/11/2020  | 7.47 | 1099 | 61.03 | 271.49 | 5.22 | 22.19 | 688.71             |
| 4/14/2020  | 7.42 | 1108 | 61.01 | 264.25 | 5.04 | 21.47 | 673.60             |
| 4/17/2020  | 7.14 | 1191 | 61.23 | 284.02 | 5.47 | 18.70 | 684.34             |
| 4/20/2020  | 7.14 | 1194 | 61.13 | 284.52 | 5.49 | 21.24 | 689.88             |
| 4/23/2020  | 6.95 | 1183 | 61.08 | 282.11 | 5.51 | 18.28 | 683.48             |
| 4/26/2020  | 6.95 | 1185 | 60.7  | 282.57 | 5.38 | 18.77 | 689.28             |
| 4/29/2020  | 7.18 | 1186 | 60.95 | 292.78 | 5.55 | 21.53 | 692.90             |
| 5/2/2020   | 7.16 | 1203 | 61.61 | 279.21 | 5.64 | 18.90 | 686.55             |
| 5/5/2020   | 7.13 | 1200 | 61.54 | 284.53 | 5.52 | 21.94 | 701.03             |

|            |      |      |       |        |      |       |        |
|------------|------|------|-------|--------|------|-------|--------|
| 5/8/2020   | 7.12 | 1190 | 61.32 | 285.75 | 5.87 | 19.11 | 685.28 |
| 5/11/2020  | 8.19 | 1193 | 61.11 | 284.87 | 5.85 | 18.61 | 701.45 |
| 5/14/2020  | 7.21 | 1191 | 60.53 | 285.05 | 5.58 | 19.26 | 693.99 |
| 5/17/2020  | 7.19 | 1200 | 60.59 | 286.70 | 5.86 | 19.45 | 701.14 |
| 5/20/2020  | 7.1  | 1208 | 60.4  | 290.97 | 5.75 | 19.49 | 698.95 |
| 5/23/2020  | 7.1  | 1203 | 60.47 | 284.34 | 5.86 | 19.49 | 697.36 |
| 5/26/2020  | 7.06 | 1199 | 60.14 | 280.10 | 5.71 | 18.62 | 688.99 |
| 5/29/2020  | 7.06 | 1189 | 60.26 | 286.10 | 5.62 | 19.18 | 700.36 |
| 6/1/2020   | 8.09 | 1075 | 60.54 | 284.31 | 5.61 | 19.12 | 701.03 |
| 6/4/2020   | 7.03 | 1091 | 60.79 | 270.96 | 5.09 | 17.92 | 678.77 |
| 6/7/2020   | 7.64 | 977  | 60.41 | 270.29 | 5.43 | 23.45 | 689.43 |
| 6/10/2020  | 7.13 | 1102 | 60.51 | 284.92 | 5.72 | 19.15 | 716.17 |
| 6/13/2020  | 7.16 | 1127 | 59.79 | 294.86 | 5.65 | 19.32 | 712.17 |
| 6/16/2020  | 7.72 | 1109 | 59.83 | 279.52 | 5.47 | 21.58 | 704.20 |
| 6/19/2020  | 7.31 | 1041 | 59.6  | 280.32 | 5.65 | 18.50 | 696.49 |
| 6/22/2020  | 7.32 | 1097 | 59.8  | 278.73 | 6.16 | 17.97 | 681.80 |
| 6/25/2020  | 7.3  | 1094 | 59.72 | 285.39 | 5.50 | 18.68 | 700.87 |
| 6/28/2020  | 7.33 | 1090 | 59.63 | 273.07 | 5.41 | 19.00 | 692.45 |
| 7/1/2020   | 7.55 | 1083 | 59.53 | 283.62 | 5.39 | 20.52 | 693.50 |
| 7/4/2020   | 7.27 | 1205 | 59.23 | 284.41 | 5.54 | 18.55 | 692.02 |
| 7/7/2020   | 7.57 | 1083 | 59.83 | 286.57 | 5.59 | 20.87 | 698.53 |
| 7/10/2020  | 7.59 | 1114 | 59.58 | 274.01 | 5.38 | 18.29 | 687.89 |
| 7/13/2020  | 8.02 | 1103 | 59.1  | 284.48 | 5.34 | 17.94 | 709.74 |
| 7/16/2020  | 7.8  | 1098 | 59.63 | 282.95 | 5.48 | 18.36 | 705.73 |
| 7/19/2020  | 7.86 | 1098 | 59.1  | 283.71 | 5.43 | 21.00 | 698.55 |
| 7/22/2020  | 7.75 | 1104 | 59.54 | 283.49 | 5.54 | 18.13 | 709.17 |
| 7/25/2020  | 7.85 | 1095 | 59.72 | 283.96 | 5.49 | 19.02 | 686.65 |
| 7/28/2020  | 7.83 | 1092 | 59.27 | 284.76 | 5.43 | 18.93 | 714.81 |
| 7/31/2020  | 7.81 | 1098 | 60.31 | 273.54 | 5.47 | 18.41 | 691.56 |
| 8/3/2020   | 7.4  | 1202 |       | 229.85 | 4.47 | 16.06 | 663.08 |
| 8/6/2020   | 7.48 | 1208 |       | 258.59 | 7.44 | 17.76 | 700.41 |
| 8/9/2020   | 7.43 | 1205 |       | 257.91 | 4.87 | 18.25 | 678.33 |
| 8/12/2020  | 7.36 | 1209 |       | 255.06 | 7.08 | 18.35 | 680.35 |
| 8/15/2020  | 7.41 | 1211 |       | 255.78 | 4.89 | 18.37 | 691.50 |
| 8/18/2020  | 7.35 | 1208 |       | 255.39 | 4.75 | 18.27 | 689.88 |
| 8/21/2020  | 8.47 | 1207 |       | 256.11 | 4.75 | 18.46 | 660.68 |
| 8/24/2020  | 7.37 | 1203 |       | 258.73 | 4.77 | 17.54 | 688.48 |
| 8/27/2020  | 7.16 | 1201 |       | 251.79 | 4.75 | 17.63 | 685.67 |
| 8/30/2020  | 7.35 | 1207 |       | 249.71 | 4.95 | 17.62 | 681.19 |
| 9/3/2020   | 7.33 | 1205 |       | 254.91 | 4.84 | 18.33 | 695.54 |
| 9/5/2020   | 7.31 | 1203 |       | 255.73 | 4.76 | 18.05 | 674.61 |
| 9/8/2020   | 7.56 | 1211 |       | 255.71 | 4.80 | 18.26 | 675.61 |
| 9/11/2020  | 7.31 | 1203 |       | 249.39 | 4.90 | 17.74 | 686.30 |
| 9/14/2020  | 7.34 | 1202 |       | 252.25 | 7.30 | 18.15 | 693.14 |
| 9/17/2020  | 7.42 | 1259 |       | 258.38 | 8.98 | 15.89 | 737.44 |
| 9/20/2020  | 7.35 | 1202 |       | 255.16 | 4.91 | 17.41 | 690.62 |
| 9/23/2020  | 7.31 | 1195 |       | 254.62 | 7.40 | 18.04 | 676.70 |
| 9/26/2020  | 7.35 | 1207 |       | 257.57 | 7.49 | 18.01 | 697.75 |
| 9/29/2020  | 7.35 | 1207 |       | 257.28 | 4.92 | 18.66 | 696.06 |
| 10/2/2020  | 7.35 | 1202 |       | 252.63 | 4.88 | 18.06 | 690.85 |
| 10/5/2020  | 7.37 | 1206 |       | 256.71 | 7.08 | 17.98 | 692.33 |
| 10/8/2020  | 7.35 | 1197 |       | 253.23 | 7.42 | 17.62 | 689.18 |
| 10/11/2020 | 8.39 | 1204 |       | 255.35 | 4.84 | 18.45 | 694.69 |
| 10/14/2020 | 7.34 | 1202 |       | 254.08 | 4.92 | 17.72 | 684.84 |
| 10/17/2020 | 7.14 | 1197 |       | 255.69 | 4.97 | 17.04 | 686.86 |
| 10/20/2020 | 7.41 | 1201 |       | 256.72 | 4.89 | 17.76 | 699.48 |
| 10/23/2020 | 7.37 | 1199 |       | 259.57 | 4.87 | 18.36 | 692.64 |
| 10/26/2020 | 7.3  | 1204 |       | 256.36 | 4.90 | 17.98 | 698.66 |
| 10/29/2020 | 7.44 | 1207 |       | 259.08 | 7.30 | 18.38 | 692.45 |
| 11/1/2020  | 7.42 | 1201 | 59.71 | 259.21 | 4.95 | 18.54 | 700.55 |
| 11/4/2020  | 7.99 | 1195 | 59.64 | 257.80 | 7.36 | 18.43 | 701.17 |
| 11/7/2020  | 7.23 | 1205 | 59.79 | 254.49 | 7.77 | 18.39 | 691.07 |
| 11/10/2020 | 7.24 | 1202 | 59.63 | 256.28 | 4.91 | 17.97 | 698.26 |
| 11/13/2020 | 8.02 | 1201 | 59.94 | 257.93 | 5.01 | 17.87 | 695.33 |
| 11/16/2020 | 7.27 | 1197 | 59.79 | 258.24 | 5.00 | 17.78 | 696.78 |



|            |      |      |       |                       |                     |                      |                    |
|------------|------|------|-------|-----------------------|---------------------|----------------------|--------------------|
| 11/19/2020 | 7.28 | 1202 | 59.84 | 256.87                | 5.03                | 18.39                | 699.75             |
| 11/22/2020 | 7.29 | 1208 | 58.99 | 257.60                | 4.98                | 18.43                | 700.96             |
| 11/25/2020 | 7.32 | 1203 | 59.66 | 258.13                | 7.23                | 17.69 Joinpoint<br>1 | 704.13             |
| 11/28/2020 | 7.34 | 1204 | 58.9  | 259.53                | 4.99                | 18.25                | 703.89             |
| 12/1/2020  | 8.07 | 1136 |       | 274.46                | 5.65                | 20.66                | 705.03             |
| 12/4/2020  | 8.08 | 1126 |       | 274.28                | 5.82 Joinpoint<br>1 | 20.96 Joinpoint<br>2 | 707.26             |
| 12/7/2020  | 8.03 | 1139 |       | 273.55                | 5.57                | 20.76                | 707.41             |
| 12/10/2020 | 8.04 | 1143 |       | 274.58                | 5.74                | 20.73                | 708.70             |
| 12/13/2020 | 8.03 | 1139 |       | 273.44                | 8.09 Joinpoint<br>2 | 21.08                | 708.85             |
| 12/16/2020 | 7.95 | 1140 |       | 272.55                | 5.73                | 20.58                | 699.37             |
| 12/19/2020 | 8.41 | 1127 |       | 271.48                | 8.28                | 20.68                | 703.13             |
| 12/22/2020 | 8.22 | 1128 |       | 268.81 Joinpoint<br>3 | 5.46                | 20.09                | 700.09             |
| 12/25/2020 | 8.26 | 1128 |       | 272.19                | 5.93                | 20.50                | 707.05             |
| 12/28/2020 | 8.39 | 1134 |       | 273.75                | 5.76                | 20.74                | 706.59             |
| 12/31/2020 | 8.43 | 1137 |       | 273.92                | 8.49                | 20.56                | 714.36             |
| 1/3/2021   | 7.98 | 1127 | 58.96 | 270.75                | 5.59                | 19.14                | 678.29             |
| 1/6/2021   | 8.06 | 1128 | 59.29 | 270.31                | 6.87                | 19.33                | 695.11             |
| 1/9/2021   | 7.75 | 1120 | 59.19 | 267.85                | 5.51                | 18.91                | 667.99             |
| 1/12/2021  | 8.01 | 1121 | 59.29 | 269.80                | 7.00                | 18.79 Joinpoint<br>3 | 692.93             |
| 1/15/2021  | 7.73 | 1116 | 59.69 | 268.03                | 7.80                | 19.58                | 655.52             |
| 1/18/2021  | 7.72 | 1128 | 59.31 | 267.57                | 7.86                | 18.78                | 687.83             |
| 1/21/2021  | 7.9  | 1136 | 59.87 | 267.95                | 7.87                | 18.72                | 676.48             |
| 1/24/2021  | 7.94 | 1137 | 59.94 | 271.21                | 7.81                | 19.93                | 688.14             |
| 1/27/2021  | 7.95 | 1136 | 59.52 | 271.20                | 7.95                | 19.23                | 696.38             |
| 1/30/2021  | 7.96 | 1138 | 59.81 | 268.56                | 7.44                | 18.81                | 688.93             |
| 2/2/2021   | 7.91 | 1134 | 59.78 | 263.88                | 5.65                | 19.15                | 605.06             |
| 2/5/2021   | 8.11 | 1142 | 59.66 | 268.73                | 8.14                | 19.20                | 621.10             |
| 2/8/2021   | 7.84 | 1142 | 59.58 | 267.94                | 8.29                | 19.19                | 658.76             |
| 2/11/2021  | 7.88 | 1139 | 59.92 | 259.91                | 9.60                | 24.20                | 684.12             |
| 2/14/2021  | 7.86 | 1147 | 59.76 | 268.83                | 5.95                | 19.02                | 662.45             |
| 2/17/2021  | 7.87 | 1145 | 59.28 | 268.92                | 8.27                | 19.57                | 684.00             |
| 2/20/2021  | 7.81 | 1145 | 59.89 | 267.76                | 5.80                | 19.45                | 667.15             |
| 2/23/2021  | 7.76 | 1147 | 59.43 | 268.82                | 6.82                | 19.54                | 665.85             |
| 2/26/2021  | 7.62 | 1147 | 59.89 | 271.00                | 7.17                | 19.31                | 638.47             |
| 3/1/2021   | 7.83 | 1126 | 60.04 | 258.76                | 6.07                | 19.43                | 633.26             |
| 3/4/2021   | 7.74 | 1120 | 60.12 | 257.73                | 6.18                | 19.52                | 673.43             |
| 3/7/2021   | 7.75 | 1121 | 60.05 | 256.09                | 6.07                | 19.36                | 666.46             |
| 3/10/2021  | 7.74 | 1134 | 59.75 | 259.44                | 6.16                | 19.56                | 681.95             |
| 3/13/2021  | 7.7  | 1138 | 59.67 | 259.86                | 6.18                | 19.65                | 679.80             |
| 3/16/2021  | 7.67 | 1122 | 59.83 | 255.70                | 6.09                | 19.13                | 677.46             |
| 3/19/2021  | 7.54 | 1132 | 59.92 | 259.50                | 6.25                | 19.81                | 678.42             |
| 3/22/2021  | 7.57 | 1122 | 59.16 | 258.34                | 6.17                | 19.64                | 678.44             |
| 3/25/2021  | 7.5  | 1127 | 60.15 | 258.21                | 6.20                | 19.41                | 659.07             |
| 3/28/2021  | 7.48 | 1123 | 59.71 | 259.48                | 6.08                | 19.49                | 675.19             |
| 3/31/2021  | 7.53 | 1134 | 59.78 | 260.41                | 6.16                | 19.58                | 673.53             |
| 4/3/2021   | 7.84 | 1126 | 59.82 | 267.48                | 6.96                | 21.28                | 689.24             |
| 4/6/2021   | 7.86 | 1119 | 59.37 | 262.74                | 6.61                | 20.69                | 679.83             |
| 4/9/2021   | 8.01 | 1112 | 60.14 | 264.53                | 6.68                | 20.62                | 680.82             |
| 4/12/2021  | 7.87 | 1127 | 60.46 | 266.13                | 6.58                | 20.95                | 687.31             |
| 4/15/2021  | 7.75 | 1110 | 59.87 | 262.24                | 6.28                | 20.73                | 675.65             |
| 4/18/2021  | 7.69 | 1123 | 60.31 | 266.02                | 6.74                | 21.05                | 682.95             |
| 4/21/2021  | 7.95 | 1114 | 59.96 | 261.97                | 6.29                | 20.42                | 681.51             |
| 4/24/2021  | 7.7  | 1112 | 60.7  | 255.91                | 6.67                | 20.05                | 674.21             |
| 4/27/2021  | 7.67 | 1105 | 60.12 | 259.67                | 6.92                | 20.30                | 679.29 Joinpoint 2 |
| 4/30/2021  | 7.67 | 1124 | 59.98 | 264.67                | 6.87                | 20.68                | 683.54             |
| 5/3/2021   | 8.1  | 1128 | 59.4  | 268.32                | 8.06                | 22.46                | 700.82             |
| 5/6/2021   | 8.13 | 1125 | 59.5  | 265.27                | 7.61                | 20.64                | 725.12             |
| 5/9/2021   | 8.03 | 1070 | 60.08 | 264.96                | 7.73                | 20.73                | 735.34 Joinpoint 3 |
| 5/12/2021  | 8.06 | 1119 | 59.81 | 266.61                | 7.75                | 20.86                | 743.77             |

|           |      |      |       |        |       |       |        |
|-----------|------|------|-------|--------|-------|-------|--------|
| 5/15/2021 | 7.86 | 1110 | 60    | 264.88 | 7.68  | 20.76 | 735.27 |
| 5/18/2021 | 7.85 | 1112 | 60.39 | 266.27 | 7.71  | 20.76 | 741.97 |
| 5/21/2021 | 8.1  | 1118 | 60.03 | 268.38 | 7.72  | 20.63 | 738.51 |
| 5/24/2021 | 7.79 | 1125 | 29.2  | 266.75 | 7.45  | 20.75 | 714.66 |
| 5/27/2021 | 7.68 | 1114 | 59.06 | 265.99 | 7.94  | 20.88 | 711.00 |
| 5/30/2021 | 7.75 | 1107 | 60.11 | 267.47 | 3.87  | 21.31 | 715.64 |
| 6/2/2021  | 8.17 | 1134 | 60.04 | 260.50 | 7.24  | 22.96 | 630.27 |
| 6/5/2021  | 8.31 | 1136 | 59.26 | 260.80 | 8.88  | 23.14 | 678.50 |
| 6/8/2021  | 8.08 | 1133 | 60    | 260.32 | 7.63  | 23.04 | 661.53 |
| 6/11/2021 | 8.04 | 1127 | 60.08 | 260.09 | 7.55  | 23.29 | 669.11 |
| 6/14/2021 | 8.09 | 1134 | 60.14 | 259.03 | 7.76  | 22.87 | 678.22 |
| 6/17/2021 | 7.94 | 1142 | 60.74 | 259.20 | 6.58  | 23.01 | 659.87 |
| 6/20/2021 | 7.85 | 1134 | 60.22 | 259.08 | 8.17  | 22.82 | 658.23 |
| 6/23/2021 | 7.76 | 1134 | 60.37 | 259.79 | 10.46 | 22.77 | 632.05 |
| 6/26/2021 | 7.72 | 1129 | 60.46 | 258.69 | 8.60  | 23.06 | 716.93 |
| 6/29/2021 | 7.84 | 1133 | 59.91 | 258.45 | 8.48  | 23.15 | 721.09 |
| 7/2/2021  | 7.8  | 1118 | 60.06 | 264.24 | 6.19  | 20.52 | 719.07 |
| 7/5/2021  | 7.83 | 1104 | 60.57 | 265.98 | 6.74  | 20.72 | 654.29 |
| 7/8/2021  | 7.74 | 1133 | 60.47 | 267.51 | 7.09  | 20.85 | 632.56 |
| 7/11/2021 | 7.87 | 1130 | 60.65 | 265.76 | 6.81  | 20.56 | 611.94 |
| 7/14/2021 | 7.7  | 1126 | 60.93 | 266.97 | 7.14  | 20.76 | 616.55 |
| 7/17/2021 | 7.67 | 1118 | 60.64 | 267.12 | 8.69  | 20.71 | 609.15 |
| 7/20/2021 | 7.45 | 1125 | 61.02 | 268.08 | 6.80  | 20.67 | 630.37 |
| 7/23/2021 | 7.54 | 1132 | 61.21 | 268.17 | 7.05  | 21.01 | 690.38 |
| 7/26/2021 | 7.46 | 1124 | 61.13 | 266.51 | 7.00  | 20.89 | 679.37 |
| 7/29/2021 | 7.29 | 1121 | 60.84 | 266.68 | 6.58  | 20.58 | 682.73 |

| Panxi spring (S16) |      |           |                |                        |                           |                        |                           |                                         |                           |           |                           |
|--------------------|------|-----------|----------------|------------------------|---------------------------|------------------------|---------------------------|-----------------------------------------|---------------------------|-----------|---------------------------|
| Date(yyyy/mm/dd)   | pH   | EC(μs/cm) | Temperature(℃) | Na <sup>+</sup> (mg/L) | CP detection<br>Joinpoint | Cl <sup>-</sup> (mg/L) | CP detection<br>Joinpoint | SO <sub>4</sub> <sup>2-</sup><br>(mg/L) | CP detection<br>Joinpoint | TDS(mg/L) | CP detection<br>Joinpoint |
| 4/10/2019          |      |           |                | 10.38                  |                           | 7.70                   |                           | 32.57                                   |                           | 356.51    |                           |
| 6/14/2019          | 7.09 | 725       | 30             | 9.33                   |                           | 5.54                   |                           | 31.02                                   |                           |           |                           |
| 6/17/2019          | 7.06 | 730       | 29.9           | 9.52                   |                           | 5.67                   |                           | 31.25                                   |                           |           |                           |
| 6/20/2019          | 7.06 | 725       | 30             | 9.39                   |                           | 5.27                   |                           | 30.44                                   |                           |           |                           |
| 6/23/2019          | 7.07 | 721       | 30             | 9.67                   |                           | 5.54                   |                           | 30.29                                   |                           |           |                           |
| 6/26/2019          | 7.06 | 742       | 30             | 9.07                   |                           | 6.50                   |                           | 32.88                                   |                           |           |                           |
| 6/29/2019          | 7.18 | 748       | 30             | 9.16                   |                           | 6.93                   |                           | 34.67                                   |                           | 365.36    |                           |
| 7/2/2019           | 7.15 | 680       | 29.9           | 9.17                   |                           | 5.96                   |                           | 32.59                                   |                           | 379.50    |                           |
| 7/5/2019           | 7.19 | 729       | 30             | 9.20                   |                           | 5.81                   |                           | 32.31                                   |                           | 367.82    |                           |
| 7/8/2019           | 7.23 | 701       | 30             | 9.28                   |                           | 5.77                   |                           | 32.63                                   |                           | 384.92    |                           |
| 7/11/2019          | 7.17 | 728       | 29.9           | 9.23                   |                           | 5.80                   |                           | 34.40                                   |                           | 386.50    |                           |
| 7/14/2019          | 7.19 | 727       | 30             | 9.28                   |                           | 5.62                   |                           | 34.31                                   |                           | 377.34    |                           |
| 7/17/2019          | 7.12 | 722       | 30             | 9.61                   |                           | 6.07                   |                           | 32.31                                   |                           | 364.30    |                           |
| 7/20/2019          | 7.14 | 729       | 29.9           | 8.79                   |                           | 6.57                   |                           | 34.11                                   |                           | 392.16    |                           |
| 7/23/2019          | 7.12 | 738       | 30             | 8.75                   |                           | 6.26                   |                           | 33.49                                   |                           | 385.49    |                           |
| 7/26/2019          | 7.18 | 716       | 29.9           | 8.79                   |                           | 6.01                   |                           | 33.96                                   |                           | 381.61    |                           |
| 7/29/2019          | 7.18 | 746       | 29.9           | 8.88                   |                           | 5.40                   |                           | 31.58                                   |                           | 357.39    |                           |
| 8/1/2019           | 6.89 | 719       | 30             | 11.29                  |                           | 5.23                   |                           | 29.35                                   |                           | 380.45    |                           |
| 8/4/2019           | 6.9  | 716       | 30             | 11.06                  |                           | 5.01                   |                           | 29.40                                   |                           | 383.29    |                           |
| 8/7/2019           | 6.92 | 715       | 29.9           | 11.59                  |                           | 5.12                   |                           | 29.39                                   |                           | 393.04    |                           |
| 8/10/2019          | 6.91 | 710       | 30             | 11.40                  |                           | 5.16                   |                           | 29.59                                   |                           | 386.52    |                           |
| 8/13/2019          | 6.92 | 719       | 29.9           | 11.27                  |                           | 5.28                   |                           | 29.59                                   |                           | 386.38    |                           |
| 8/16/2019          | 6.91 | 717       | 29.9           | 11.38                  |                           | 5.09                   |                           | 29.46                                   |                           | 385.92    |                           |
| 8/19/2019          | 6.88 | 719       | 30             | 11.24                  |                           | 5.10                   |                           | 28.82                                   |                           | 388.33    |                           |
| 8/22/2019          | 6.92 | 720       | 30             | 11.09                  |                           | 5.15                   |                           | 30.09                                   |                           | 386.90    |                           |
| 8/25/2019          | 6.84 | 721       | 29.9           | 11.27                  |                           | 5.22                   |                           | 30.10                                   |                           | 388.57    |                           |
| 8/28/2019          | 6.85 | 720       | 29.9           | 11.14                  | Joinpoint<br>1            | 5.70                   |                           | 30.10                                   |                           | 392.55    |                           |
| 8/31/2019          | 6.91 | 723       |                | 11.16                  |                           | 5.13                   |                           | 29.64                                   |                           | 384.48    |                           |
| 9/3/2019           | 7.06 | 732       | 29.9           | 8.31                   |                           | 5.39                   |                           | 30.04                                   |                           | 392.52    |                           |
| 9/6/2019           | 7.14 | 730       | 30             | 8.54                   | Joinpoint<br>2            | 5.62                   |                           | 31.05                                   |                           | 395.48    |                           |
| 9/9/2019           | 7.07 | 729       | 29.9           | 8.67                   |                           | 5.62                   |                           | 30.91                                   |                           | 382.92    |                           |
| 9/12/2019          | 7.26 | 729       | 29.9           | 8.65                   |                           | 5.74                   |                           | 30.84                                   |                           | 397.81    |                           |
| 9/15/2019          | 6.98 | 733       | 29.9           | 8.95                   |                           | 5.72                   |                           | 30.80                                   |                           | 397.10    |                           |
| 9/18/2019          | 7.14 | 733       | 30             | 8.58                   |                           | 5.62                   |                           | 30.96                                   |                           | 384.11    |                           |
| 9/21/2019          | 7.09 | 727       | 30             | 9.33                   |                           | 5.70                   |                           | 31.06                                   |                           | 402.58    |                           |
| 9/24/2019          | 7.11 | 728       | 29.9           | 8.57                   |                           | 5.52                   |                           | 30.71                                   |                           | 396.76    |                           |
| 9/27/2019          | 7.01 | 727       | 29.9           | 8.47                   |                           | 5.60                   |                           | 31.07                                   |                           | 391.26    |                           |
| 9/30/2019          | 7.1  | 724       | 29.9           |                        |                           |                        |                           |                                         |                           |           |                           |
| 10/3/2019          | 7.08 | 711       | 30             | 10.22                  |                           | 5.11                   |                           | 30.59                                   |                           | 381.84    |                           |
| 10/6/2019          | 7.08 | 708       | 30             | 9.71                   |                           | 5.08                   |                           | 30.25                                   |                           | 395.97    |                           |
| 10/9/2019          | 7.05 | 710       | 29.9           | 9.62                   |                           | 5.09                   |                           | 30.31                                   |                           | 399.91    |                           |
| 10/12/2019         | 7.05 | 710       | 30             | 10.25                  |                           | 5.36                   |                           | 30.72                                   |                           | 399.69    |                           |
| 10/15/2019         | 7.12 | 709       | 29.9           | 9.81                   |                           | 5.10                   |                           | 30.22                                   |                           | 401.13    |                           |
| 10/18/2019         | 7.18 | 711       | 29.9           | 9.67                   |                           | 5.08                   |                           | 30.20                                   |                           | 398.85    |                           |
| 10/21/2019         | 7.08 | 705       | 30             | 10.07                  |                           | 4.89                   |                           | 29.26                                   |                           | 378.03    |                           |
| 10/24/2019         | 7.16 | 704       | 29.9           | 10.06                  |                           | 5.07                   |                           | 29.53                                   |                           | 385.93    |                           |
| 10/27/2019         | 7.12 | 702       | 30             | 10.10                  |                           | 5.19                   |                           | 29.74                                   |                           | 399.35    |                           |
| 10/30/2019         | 7.16 | 698       | 30             | 9.91                   | Joinpoint<br>3            | 4.70                   |                           | 29.01                                   |                           | 394.47    |                           |
| 11/1/2019          | 7.01 | 744       | 29.9           | 10.46                  |                           | 4.46                   |                           | 27.49                                   |                           | 386.27    |                           |
| 11/4/2019          | 7.05 | 744       | 29.9           | 10.81                  |                           | 4.41                   |                           | 29.61                                   |                           | 386.95    |                           |
| 11/7/2019          | 7.14 | 742       | 30             | 10.73                  |                           | 4.53                   |                           | 29.23                                   |                           | 384.13    |                           |
| 11/10/2019         | 7.09 | 746       | 29.9           | 10.20                  |                           | 4.58                   | Joinpoint 1               | 29.43                                   |                           | 385.03    |                           |
| 11/13/2019         | 7.31 | 739       | 29.9           | 10.47                  |                           | 4.57                   |                           | 27.52                                   |                           | 385.25    |                           |
| 11/16/2019         | 7.12 | 751       | 30             | 10.47                  |                           | 4.60                   |                           | 29.09                                   |                           | 389.09    |                           |
| 11/19/2019         | 7.22 | 748       | 29.9           | 10.58                  |                           | 4.50                   |                           | 27.31                                   |                           | 384.60    |                           |
| 11/22/2019         | 7.23 | 749       | 29.9           | 10.29                  |                           | 4.51                   |                           | 27.59                                   |                           | 386.44    |                           |
| 11/25/2019         | 7.17 | 753       | 29.9           | 10.33                  |                           | 4.64                   |                           | 29.34                                   |                           | 385.14    |                           |
| 11/28/2019         | 7.11 | 765       | 29.9           | 10.43                  |                           | 5.00                   |                           | 30.30                                   |                           | 387.91    |                           |
| 12/1/2019          | 6.84 | 715       | 30             | 9.65                   |                           | 4.53                   |                           | 27.15                                   |                           | 360.76    |                           |

|            |       |     |      |       |       |             |        |             |
|------------|-------|-----|------|-------|-------|-------------|--------|-------------|
| 12/4/2019  | 6.99  | 713 | 29.9 | 9.63  | 4.45  | 30.88       | 388.39 |             |
| 12/7/2019  | 6.92  | 723 | 30   | 9.54  | 4.50  | 27.32       | 366.82 |             |
| 12/10/2019 | 6.87  | 723 | 30   | 9.64  | 4.68  | 27.53       | 386.62 |             |
| 12/13/2019 | 6.95  | 734 | 30   | 9.68  | 4.88  | 28.01       | 394.03 |             |
| 12/16/2019 | 6.82  | 742 | 29.9 | 9.95  | 6.32  | 28.38       | 389.95 |             |
| 12/19/2019 | 6.97  | 741 | 29.9 | 10.08 | 4.71  | 30.47       | 390.18 |             |
| 12/22/2019 | 6.91  | 748 | 29.9 | 9.71  | 4.85  | 28.53       | 376.46 |             |
| 12/25/2019 | 6.97  | 744 | 29.9 | 10.10 | 4.36  | 27.92       | 385.69 |             |
| 12/28/2019 | 7.35  | 652 | 29.9 | 10.11 | 4.77  | 31.80       | 330.06 |             |
| 12/31/2019 | 6.83  | 735 | 29.9 | 10.48 | 4.67  | 28.66       | 387.77 |             |
| 1/3/2020   | 7.36  | 452 | 30   | 10.28 | 10.10 | 31.21       | 351.37 |             |
| 1/6/2020   | 7.27  | 487 | 29.9 | 10.34 | 5.03  | 33.81       | 369.73 |             |
| 1/9/2020   | 7.21  | 598 | 29.9 | 10.47 | 6.36  | 32.21       | 418.96 |             |
| 1/12/2020  | 7.35  | 626 | 30   | 10.49 | 5.37  | 34.66       | 416.26 |             |
| 1/15/2020  | 7.41  | 457 | 30   | 10.55 | 5.80  |             | 321.17 |             |
| 1/18/2020  | 6.91  | 630 | 30   | 10.86 | 5.39  | 32.78       | 403.32 |             |
| 1/21/2020  | 7.3   | 627 | 30   | 10.68 | 5.25  | 30.34       | 424.50 |             |
| 1/24/2020  | 7.31  | 565 | 30   | 10.45 | 5.38  | 35.66       | 390.17 |             |
| 1/27/2020  | 7.18  | 633 | 30   | 10.30 | 6.08  | 32.57       | 429.37 |             |
| 1/30/2020  | 7.17  | 580 | 30   | 10.42 | 5.33  | 32.01       | 394.82 |             |
| 2/2/2020   | 7.09  | 631 | 30   | 10.62 | 5.96  | 31.25       | 418.28 |             |
| 2/5/2020   | 7.18  | 631 | 30   | 10.47 | 5.15  | 34.83       | 427.07 |             |
| 2/8/2020   | 7.1   | 633 | 30   | 10.56 | 5.45  | 31.13       | 423.00 |             |
| 2/11/2020  | 7.15  | 638 | 29.9 | 10.39 | 5.96  | 31.30       | 422.27 |             |
| 2/14/2020  | 7.35  | 637 | 30   | 10.38 | 5.60  | 34.49       | 427.85 |             |
| 2/17/2020  | 7.29  | 637 | 30   | 12.52 | 8.22  | 35.46       | 446.64 |             |
| 2/20/2020  | 7.16  | 637 | 29.9 | 10.36 | 5.48  | 33.89       | 423.19 |             |
| 2/23/2020  | 7.17  | 640 | 30   | 10.16 | 5.40  | 33.97       | 449.73 |             |
| 2/26/2020  | 7.2   | 636 | 30   | 10.20 | 5.71  | 33.26       | 428.75 |             |
| 2/29/2020  | 7.23  | 635 | 29.9 | 11.02 | 6.43  | 33.12       | 429.62 |             |
| 3/3/2020   | 7.21  | 639 | 30   | 10.26 | 7.09  | 34.18       | 427.86 |             |
| 3/6/2020   | 7.19  | 641 | 30   | 10.36 | 6.28  | 36.75       | 425.61 |             |
| 3/9/2020   | 7.33  | 603 | 29.9 | 10.99 | 6.45  | 34.44       | 426.31 |             |
| 3/12/2020  | 7.21  | 641 | 29.9 | 10.29 | 6.22  | 34.40       | 425.65 |             |
| 3/15/2020  | 7.22  | 634 | 30   | 10.09 | 5.94  | 31.37       | 414.00 |             |
| 3/18/2020  | 7.22  | 639 | 30   | 10.23 | 5.65  | 32.44       | 421.62 |             |
| 3/21/2020  | 7.22  | 639 | 30   | 10.36 | 5.72  | 31.75       | 418.55 |             |
| 3/24/2020  | 7.21  | 640 | 29.9 | 10.20 | 6.01  | 33.74       | 426.00 |             |
| 3/27/2020  | 7.22  | 636 | 30   | 10.28 | 5.75  | 35.41       | 432.03 |             |
| 3/30/2020  | 7.74  | 408 | 29.9 | 10.62 | 5.92  | 31.36       | 413.20 |             |
| 4/2/2020   | 7.3   | 592 | 29.9 | 10.22 | 6.15  | 32.83       | 424.49 |             |
| 4/5/2020   | 7.3   | 643 | 30   | 9.97  | 5.59  | 32.57       | 417.11 |             |
| 4/8/2020   | 7.3   | 486 | 30   | 10.17 | 5.93  | 34.73       | 358.89 |             |
| 4/11/2020  | 7.22  | 632 | 30   | 9.97  | 6.43  | 31.36       | 417.45 |             |
| 4/14/2020  | 7.21  | 636 | 29.9 | 10.16 | 6.02  | 32.17       | 420.82 |             |
| 4/17/2020  | 6.99  | 632 | 30   | 10.09 | 6.34  | 28.79       | 406.04 |             |
| 4/20/2020  | 7.06  | 634 | 29.9 | 11.00 | 7.17  | 33.11       | 423.75 |             |
| 4/23/2020  | 7.13  | 632 | 29.9 | 11.55 | 6.44  | 33.61       | 427.17 |             |
| 4/26/2020  | 7.15  | 635 | 30   | 10.67 | 5.96  | 32.97       | 430.12 |             |
| 4/29/2020  | 7.27  | 630 | 29.9 | 10.42 | 6.60  | 35.93       | 437.22 | Joinpoint 1 |
| 5/2/2020   | 7.07  | 658 |      | 10.12 | 6.98  | 38.05       | 453.97 |             |
| 5/5/2020   | 7.12  | 659 |      | 9.99  | 7.71  | 38.18       | 443.24 |             |
| 5/8/2020   | 7.07  | 658 | 29.7 | 10.53 | 7.69  | 39.97       | 448.05 |             |
| 5/11/2020  | 7.08  | 657 | 30   | 9.87  | 7.03  | 35.96       | 451.05 |             |
| 5/14/2020  | 7.09  | 657 | 29.6 | 10.14 | 6.95  | 36.10       | 454.42 |             |
| 5/17/2020  | 7.1   | 661 | 30   | 9.50  | 6.81  | 35.96       | 442.83 |             |
| 5/20/2020  | 7.09  | 662 | 29.8 | 10.35 | 7.31  | 39.72       | 453.83 |             |
| 5/23/2020  | 7.14  | 623 | 29.9 | 9.95  | 5.90  | 34.23       | 432.29 |             |
| 5/26/2020  | 7.14. | 639 | 29.9 | 9.86  | 5.78  | 36.01       | 431.51 |             |
| 5/29/2020  | 7.21  | 644 | 30   | 10.29 | 6.60  | 39.08       | 432.56 |             |
| 6/1/2020   | 7.18  | 638 | 29.8 | 9.97  | 6.60  | 35.98       | 433.57 |             |
| 6/4/2020   | 6.91  | 657 | 29.9 | 9.53  | 6.78  | 37.23       | 440.83 |             |
| 6/7/2020   | 7.15  | 656 | 29.9 | 9.28  | 6.96  | 34.56       | 432.60 |             |
| 6/10/2020  | 7.14  | 652 | 30   | 9.38  | 10.57 | Joinpoint 2 | 439.58 |             |
| 6/13/2020  | 7.04  | 578 | 29.9 | 9.50  | 7.50  | 35.50       | 426.60 |             |
| 6/16/2020  | 7.15  | 652 | 29.8 | 9.38  | 7.57  | 34.54       | 439.37 |             |

|            |      |       |      |       |      |       |             |        |
|------------|------|-------|------|-------|------|-------|-------------|--------|
| 6/19/2020  | 7.2  | 581   | 29.7 | 9.03  | 6.67 | 34.45 |             | 435.88 |
| 6/22/2020  | 7.31 | 584   | 29.9 | 9.76  | 9.57 | 39.93 |             | 432.56 |
| 6/25/2020  | 7.25 | 571   | 29.8 | 9.47  | 8.90 | 40.81 |             | 419.80 |
| 6/28/2020  | 7.21 | 563   | 29.9 | 9.31  | 8.74 | 40.30 | Joinpoint 1 | 402.49 |
| 7/1/2020   | 7.3  | 751   | 29.9 | 8.68  | 7.00 | 32.00 |             | 404.93 |
| 7/4/2020   | 7.4  | 753   | 29.7 | 8.11  | 7.67 | 31.82 |             | 401.45 |
| 7/7/2020   | 7.24 | 784   | 29.8 | 9.46  | 5.22 | 26.73 | Joinpoint 2 | 411.58 |
| 7/10/2020  | 7.22 | 780   | 30   | 9.49  | 5.35 | 27.13 |             | 411.85 |
| 7/13/2020  | 7.26 | 779   | 29.9 | 9.50  | 5.09 | 26.56 |             | 414.80 |
| 7/16/2020  | 7.22 | 783   | 29.7 | 9.32  | 5.23 | 26.87 |             | 402.53 |
| 7/19/2020  | 7.36 | 781   | 30   | 9.27  | 5.35 | 27.17 |             | 410.96 |
| 7/22/2020  | 7.21 | 774   | 29.9 | 9.31  | 5.04 | 26.38 |             | 414.28 |
| 7/25/2020  | 7.19 | 776   | 29.6 | 9.63  | 5.17 | 26.31 |             | 410.08 |
| 7/28/2020  | 7.19 | 777   | 29.9 | 9.94  | 5.13 | 26.53 |             | 407.10 |
| 7/31/2020  | 7.41 | 636   | 29.9 | 9.31  | 5.14 | 26.42 |             | 371.93 |
| 8/6/2020   | 7.16 | 775   |      | 9.29  | 5.52 | 27.07 |             | 414.44 |
| 8/9/2020   | 7.19 | 776   |      | 9.49  | 5.43 | 26.83 |             | 406.42 |
| 8/12/2020  | 7.11 | 776   |      | 9.31  | 5.38 | 27.04 |             | 409.24 |
| 8/15/2020  | 7.11 | 778   |      | 9.10  | 6.87 | 27.06 |             | 405.36 |
| 8/18/2020  | 7    | 775   |      | 9.44  | 7.14 | 26.97 |             | 413.39 |
| 8/21/2020  | 7.11 | 777   |      | 9.38  | 5.30 | 26.84 |             | 405.61 |
| 8/24/2020  | 7.22 | 778   |      | 9.67  | 5.46 | 26.86 |             | 410.32 |
| 8/27/2020  | 7.08 | 771   |      | 9.73  | 5.11 | 26.61 |             | 410.50 |
| 8/30/2020  | 7    | 773   |      | 9.58  | 5.25 | 26.52 |             | 406.05 |
| 9/2/2020   | 7.15 | 778   | 29.9 | 9.31  | 5.38 | 26.81 |             | 395.98 |
| 9/5/2020   | 7.02 | 773   | 29.8 | 9.32  | 4.85 | 26.04 |             | 399.82 |
| 9/8/2020   | 7.06 | 771   | 29.9 | 9.32  | 5.20 | 26.28 |             | 405.53 |
| 9/11/2020  | 7.71 | 618   | 29.9 | 9.10  | 5.60 | 26.53 |             | 408.21 |
| 9/14/2020  | 7.1  | 783   | 29.8 | 9.43  | 5.68 | 27.53 |             | 412.74 |
| 9/17/2020  | 6.86 | 781   | 29.9 | 9.41  | 5.67 | 27.52 |             | 407.86 |
| 9/20/2020  | 7.33 | 782   | 29.9 | 9.64  | 5.74 | 27.32 |             | 416.23 |
| 9/23/2020  | 6.87 | 781   | 29.8 | 9.68  | 5.89 | 27.46 |             | 418.22 |
| 9/26/2020  | 7.25 | 786   | 29.9 | 9.79  | 6.12 | 27.34 |             | 410.73 |
| 9/29/2020  | 7.29 | 775   | 29.9 | 9.51  | 5.63 | 27.34 |             | 414.30 |
| 10/2/2020  | 6.96 | 776   |      | 9.41  | 5.58 | 27.25 |             | 402.76 |
| 10/5/2020  | 7.06 | 771   |      | 10.22 | 5.37 | 26.72 |             | 410.40 |
| 10/8/2020  | 7.09 | 767   |      | 9.28  | 5.08 | 26.43 |             | 412.75 |
| 10/11/2020 | 7.11 | 761   |      | 9.73  | 4.86 | 25.36 |             | 403.86 |
| 10/14/2020 | 6.88 | 759   |      | 9.64  | 5.03 | 25.29 |             | 387.43 |
| 10/17/2020 | 7.08 | 757   |      | 9.85  | 5.03 | 25.69 |             | 404.60 |
| 10/20/2020 | 7.07 | 757   |      | 9.80  | 5.14 | 25.45 |             | 405.78 |
| 10/23/2020 | 7.03 | 762   |      | 9.84  | 4.76 | 25.65 | Joinpoint 3 | 405.00 |
| 10/26/2020 | 7.14 | 755   |      | 9.59  | 4.75 | 24.75 |             | 394.30 |
| 10/29/2020 | 6.98 | 756   |      | 9.66  | 4.69 | 24.84 |             | 397.95 |
| 11/1/2020  | 7.1  | 709.7 | 29.9 | 9.34  | 4.90 | 25.57 |             | 453.82 |
| 11/4/2020  | 7.03 | 696.6 | 29.9 | 9.58  | 4.23 | 24.76 |             | 454.51 |
| 11/7/2020  | 7.08 | 702.1 | 30   | 9.80  | 4.54 | 24.88 |             | 456.11 |
| 11/10/2020 | 6.7  | 696.8 | 30   | 9.45  | 4.32 | 24.09 |             | 453.74 |
| 11/13/2020 | 6.9  | 694.6 | 29.8 | 9.86  | 4.54 | 24.34 |             | 453.22 |
| 11/16/2020 | 6.89 | 695.2 | 29.9 | 9.84  | 4.56 | 24.89 |             | 452.59 |
| 11/19/2020 | 6.94 | 698.9 | 29.8 | 9.53  | 4.61 | 24.58 |             | 461.67 |
| 11/22/2020 | 6.97 | 703.2 | 30   | 9.02  | 5.04 | 25.47 |             | 460.21 |
| 11/25/2020 | 6.77 | 719.5 | 29.9 | 10.21 | 4.85 | 25.49 |             | 446.45 |
| 11/28/2020 | 6.94 | 703.3 | 30   | 9.01  | 6.40 | 24.63 | Joinpoint 3 | 452.29 |
| 12/1/2020  | 6.98 | 724.4 | 30   | 9.61  | 5.05 | 26.61 |             | 426.36 |
| 12/4/2020  | 7.23 | 730.1 | 29.9 | 9.85  | 7.03 | 27.56 |             | 434.65 |
| 12/7/2020  | 7.15 | 731.3 | 30   | 9.78  | 6.78 | 27.01 |             | 429.61 |
| 12/10/2020 | 7.14 | 724   |      | 9.87  | 5.72 | 26.50 |             | 424.06 |
| 12/13/2020 | 7.1  | 730.4 |      | 10.14 | 6.66 | 26.25 |             | 428.23 |
| 12/16/2020 | 7.44 | 724.6 |      | 9.95  | 5.43 | 26.30 |             | 414.85 |
| 12/19/2020 | 7.43 | 725.5 |      | 10.02 | 5.34 | 26.55 |             | 428.48 |
| 12/22/2020 | 7.06 | 727.2 |      | 10.06 | 7.41 | 26.28 |             | 421.71 |
| 12/25/2020 | 7.24 | 719.1 |      | 9.89  | 5.13 | 25.79 |             | 424.84 |
| 12/28/2020 | 7.03 | 726.8 |      | 9.92  | 5.26 | 25.86 |             | 432.51 |
| 12/31/2020 | 7.45 | 605.4 |      | 9.94  | 7.03 | 25.52 |             | 377.83 |

|           |      |       |      |       |      |       |        |             |
|-----------|------|-------|------|-------|------|-------|--------|-------------|
| 1/3/2021  | 7.81 | 675.9 | 29.9 | 9.86  | 4.64 | 25.29 | 392.64 |             |
| 1/6/2021  | 7.98 | 658.9 | 29.9 | 10.01 | 4.67 | 25.87 | 404.85 |             |
| 1/9/2021  | 7.73 | 650.6 | 30   | 9.89  | 4.89 | 25.16 | 401.32 |             |
| 1/12/2021 | 7.82 | 675.8 | 30   | 10.35 | 4.64 | 25.53 | 395.42 |             |
| 1/15/2021 | 7.41 | 700   | 29.8 | 10.23 | 5.20 | 26.04 | 409.13 |             |
| 1/18/2021 | 7.35 | 711.8 | 29.9 | 9.73  | 5.66 | 26.77 | 412.26 |             |
| 1/21/2021 | 7.25 | 708.6 | 30   | 9.81  | 5.33 | 26.51 | 412.01 |             |
| 1/24/2021 | 7.39 | 715.7 | 29.9 | 10.28 | 5.66 | 26.51 | 419.46 |             |
| 1/27/2021 | 7.35 | 713.3 | 29.9 | 9.87  | 5.49 | 26.34 | 418.49 |             |
| 1/30/2021 | 7.55 | 716.6 | 30   | 9.90  | 5.88 | 26.23 | 414.01 |             |
| 2/5/2021  | 7.05 | 720.5 |      | 9.20  | 6.45 | 34.63 | 426.84 |             |
| 2/11/2021 | 7.21 | 717.6 |      | 9.33  | 6.13 | 34.03 | 423.38 |             |
| 2/14/2021 | 7.39 | 720.1 |      | 9.28  | 6.32 | 34.45 | 428.91 |             |
| 2/20/2021 | 7.26 | 687.1 |      | 9.21  | 6.24 | 33.90 | 405.01 |             |
| 2/23/2021 | 7.03 | 728.5 |      | 8.94  | 6.92 | 35.40 | 436.10 |             |
| 2/25/2021 | 6.99 | 726.2 |      | 9.07  | 7.04 | 35.32 | 437.60 |             |
| 3/1/2021  | 7.17 | 728.7 | 29.8 | 9.31  | 6.42 | 28.34 | 435.77 |             |
| 3/4/2021  | 7.22 | 718.4 | 29.8 | 9.02  | 6.26 | 28.08 | 434.11 |             |
| 3/7/2021  | 7.2  | 730.3 | 29.9 | 9.60  | 6.14 | 28.31 | 435.20 |             |
| 3/10/2021 | 7.16 | 730.6 | 29.9 | 8.63  | 6.06 | 27.61 | 425.31 |             |
| 3/13/2021 | 7.46 | 651.9 | 29.8 | 8.97  | 6.04 | 27.61 | 390.04 |             |
| 3/16/2021 | 7.14 | 737.2 | 29.9 | 9.43  | 6.67 | 29.28 | 435.36 |             |
| 3/19/2021 | 7.32 | 724   | 29.9 | 8.78  | 6.38 | 28.35 | 434.01 |             |
| 3/22/2021 | 7.47 | 734   | 29.9 | 8.86  | 6.57 | 28.55 | 437.86 |             |
| 3/25/2021 | 7.41 | 729.6 | 29.8 | 8.42  | 6.15 | 27.26 | 422.34 |             |
| 3/28/2021 | 7.32 | 730.5 | 29.8 | 9.04  | 6.31 | 28.38 | 433.04 |             |
| 3/31/2021 | 7.48 | 688.8 | 29.9 | 9.27  | 6.38 | 28.64 | 429.61 |             |
| 4/3/2021  | 7.26 | 727.3 |      | 8.95  | 7.30 | 38.44 | 439.27 |             |
| 4/6/2021  | 7.21 | 726.8 |      | 8.75  | 7.36 | 38.25 | 444.02 |             |
| 4/9/2021  | 7.14 | 729.4 |      | 8.89  | 7.28 | 38.22 | 447.35 |             |
| 4/12/2021 | 7.22 | 733.6 |      | 8.90  | 7.30 | 37.94 | 452.05 |             |
| 4/15/2021 | 7.7  | 709.9 |      | 9.22  | 6.67 | 36.67 | 439.57 |             |
| 4/18/2021 | 7.6  | 580.5 |      | 9.07  | 6.48 | 36.57 | 382.47 |             |
| 4/21/2021 | 7.61 | 551.5 |      | 9.04  | 6.44 | 36.57 | 376.60 | Joinpoint 2 |
| 4/24/2021 | 7.21 | 705.8 |      | 8.86  | 7.00 | 37.06 | 440.49 |             |
| 4/27/2021 | 7.55 | 658.6 |      | 8.72  | 7.03 | 37.70 | 443.79 |             |
| 4/30/2021 | 7.27 | 726.4 |      | 8.75  | 7.27 | 38.44 | 453.79 |             |
| 5/3/2021  | 7.73 | 644.3 |      | 9.14  | 7.11 | 37.47 | 454.97 |             |
| 5/6/2021  | 7.5  | 674.5 |      | 9.14  | 7.13 | 37.00 | 458.22 |             |
| 5/9/2021  | 7.39 | 670.9 |      | 9.19  | 7.18 | 37.24 | 451.98 |             |
| 5/12/2021 | 7.25 | 674.1 |      | 9.19  | 7.11 | 37.04 | 455.36 |             |
| 5/15/2021 | 7.51 | 661.3 |      | 9.17  | 7.15 | 37.17 | 457.09 |             |
| 5/18/2021 | 7.48 | 733.7 |      | 8.90  | 8.46 | 40.50 | 492.61 |             |
| 5/21/2021 | 7.56 | 716.9 |      | 8.91  | 8.51 | 40.48 | 501.69 | Joinpoint 3 |
| 5/24/2021 | 7.52 | 717.8 |      | 8.84  | 8.56 | 40.61 | 491.39 |             |
| 5/27/2021 | 7.39 | 721.3 |      | 9.36  | 7.70 | 38.30 | 481.00 |             |
| 5/30/2021 | 7.6  | 647   |      | 9.31  | 8.02 | 39.30 | 450.32 |             |
| 6/2/2021  | 7.22 | 740.9 |      | 9.05  | 7.85 | 40.62 | 461.08 |             |
| 6/5/2021  | 7.16 | 740.6 |      | 8.96  | 7.70 | 40.50 | 460.93 |             |
| 6/8/2021  | 7.2  | 763.2 |      | 8.83  | 9.71 | 47.73 | 489.89 |             |
| 6/11/2021 | 7.26 | 764.7 |      | 8.97  | 9.82 | 46.07 | 490.98 |             |
| 6/14/2021 | 7.3  | 767.3 |      | 8.83  | 9.74 | 45.39 | 491.18 |             |
| 6/17/2021 | 7.23 | 751.4 |      | 9.25  | 8.40 | 42.54 | 475.70 |             |
| 6/20/2021 | 7.25 | 750.4 |      | 9.11  | 8.35 | 42.60 | 457.56 |             |
| 6/23/2021 | 7.2  | 753.6 |      | 9.23  | 8.38 | 42.04 | 472.84 |             |
| 6/26/2021 | 7.17 | 753   |      | 9.13  | 8.37 | 42.05 | 472.44 |             |
| 6/29/2021 | 7.18 | 744.9 |      | 9.21  | 8.25 | 41.96 | 467.22 |             |
| 7/2/2021  | 7.23 | 736.2 |      | 9.61  | 7.21 | 39.55 | 446.22 |             |
| 7/5/2021  | 7.41 | 721.9 |      | 9.78  | 6.70 | 37.00 | 429.73 |             |

|           |      |       |      |      |       |        |
|-----------|------|-------|------|------|-------|--------|
| 7/8/2021  | 7.44 | 726.4 | 9.89 | 6.69 | 36.87 | 435.39 |
| 7/11/2021 | 7.34 | 728.3 | 9.51 | 6.82 | 37.12 | 426.98 |
| 7/14/2021 | 7.38 | 720.1 | 9.82 | 6.75 | 37.09 | 423.87 |
| 7/17/2021 | 7.17 | 730.1 | 9.83 | 6.66 | 36.94 | 396.05 |
| 7/20/2021 | 7.43 | 725.6 | 9.40 | 6.51 | 36.79 | 423.46 |
| 7/23/2021 | 7.5  | 740   | 9.19 | 8.91 | 43.34 | 448.08 |
| 7/27/2021 | 7.19 | 759.2 | 9.45 | 8.71 | 42.45 | 461.11 |
| 7/29/2021 | 7.19 | 762.6 | 9.47 | 8.69 | 42.65 | 461.45 |

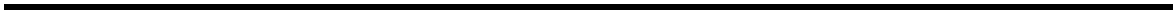

Supplement: s1 [file s1]
